# Supplementary material for: Synergistic catalysis within TEMPO-functionalized periodic mesoporous organosilica with bridge imidazolium groups in the aerobic oxidation of alcohols
Source: Royal Society of Chemistry journal article supplement (doi:10.1039/c6ra15483b), 2016-01-01
Supplement: c6ra15483b1.pdf [file c6ra15483b1.pdf]

## Supporting Information

### **Synergistic catalysis relay within the TEMPO-functionalized periodic mesoporous organosilica with imidazolium framework in the aerobic oxidation of alcohols**

Babak Karimi,<sup>\*, a</sup> Saleh Vahdati<sup>a</sup> and Hojatollah Vali<sup>b</sup>

<sup>a</sup> Department of Chemistry, Institute for Advanced Studies in Basic Sciences (IASBS), Gava Zang, Zanjan 45137-6731 (Iran) E-mail: karimi@iasbs.ac.ir

<sup>b</sup> Department of Anatomy and Cell Biology and Facility for Electron Microscopy Research, McGill University, Montreal, Quebec, H3A 2A7 Canada

#### **Table of Contents**

##### **1- Experimental procedure**

- 1-1 General procedure for synthesis of 1,3-bis(trimethoxysilylpropyl)imidazolium chloride ionic liquid (Page S1)
- 1-2 General procedure for synthesis of PMO-IL (Page S1)
- 1-3 General procedure for synthesis of PMO-IL-AMP (Page S2)
- 1-4 General procedure for synthesis of TEMPO@PMO-IL-Cl (Page S2)
- 1-5 General procedure for chloride counter ion of ionic liquid exchange by bromide (TEMPO@PMO-IL-Br) (Page S4)
- 1-6 A typical catalytic procedure for oxidation of alcohols using TEMPO@PMO-IL-Br (Page S5)

##### **2- Characterizations of catalyst**

- 2-1- Instrument (Page S5)
- 2-2 FT-IR spectroscopy (Page S5)
- 2-3 TEM images for TEMPO@PMO-IL (Page S6)
- 2-4 TGA analysis of PMO-IL, PMO-IL-AMP and TEMPO@PMO-IL (Page S6-S7)
- 2-5 Small angle X-ray scattering (SAXC) of TEMPO@PMO-IL-Br (Page S7)
- 2-6 Solid state EPR spectra of TEMPO@PMO-IL-Br (Page S8)
- 2-7 Elemental analysis (CHN analysis) (Page S8)
- 2-8 N<sub>2</sub> adsorption-desorption analyses of PMO-IL, PMO-IL-AMP, TEMPO@PMO-IL and recovered TEMPO@PMO-IL (Page S9-S10)

##### **3- Some of the Gas chromatograms and NMR of oxidation of alcohols to ensure completion of reaction (Page S12)**

### 1-1- General procedure for synthesis of 1,3-bis(trimethoxysilylpropyl) imidazolium chloride ionic liquid :

The ionic liquid was prepared by few modifications of our last synthetic reports.<sup>1</sup> In a typical experiment, a suspension of sodium imidazolide in dry THF was prepared from the direct reaction of dried imidazole (29.4 mmol) and NaH 95% (32 mmol) at a two-neck flask containing dry THF (60 ml) under argon atmosphere. Then 3-chloropropyltrimethoxysilan (5.4 ml) were added to resulting suspension of sodium imidazolide and stirred at 65 °C for 36 h under argon atmosphere. After cooling the reaction mixture to room temperature, the solvent was removed under reduced pressure and 3-chloropropyltrimethoxysilan (5.4 ml) were added to the resulting oily products and the mixture was additionally stirred at 110 °C for 72 h (If the reaction mixture was very viscous small amount of toluene were added). (If the reaction mixture was very viscous small amount of toluene were added). Then, the reaction mixture were cooled down to room temperature and dry CH<sub>2</sub>Cl<sub>2</sub> (60 ml) was added to remove the precipitated NaCl. In the next stage, CH<sub>2</sub>Cl<sub>2</sub> phase was transferred to the well-dried/two-necks flask under inert atmosphere and the excess of CH<sub>2</sub>Cl<sub>2</sub> removed under reduced pressure until the ionic liquid and unreacted starting materials obtained. Finally, ionic liquid was washed using dry toluene (5×50 ml) for remove of unreacted starting materials to give pure imidazolium ionic liquid.

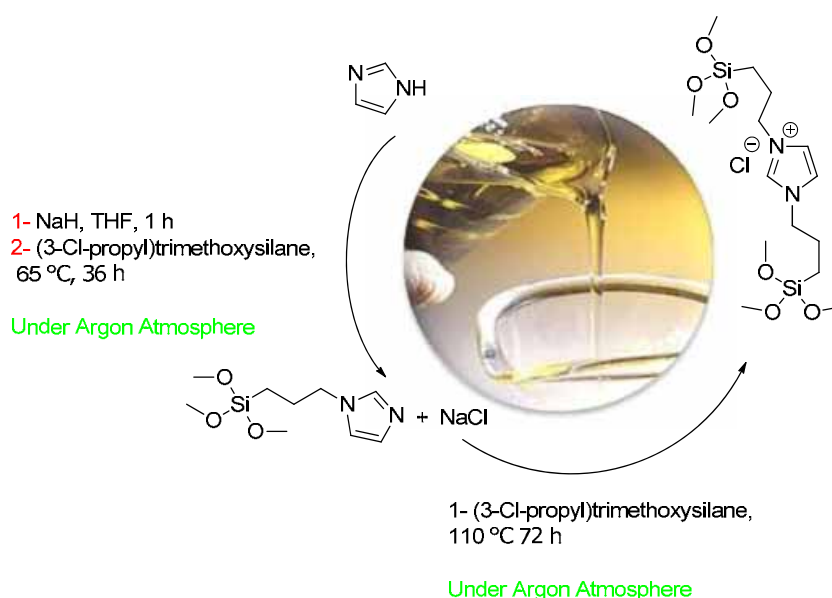

### 1-2- General procedure for synthesis of PMO-IL

PMO-IL was prepared according to our previously reported procedure.<sup>1</sup> In a typical synthesis, Pluronic P123 (1.67 g) and KCl (8.8 g) were added to a solution of distilled water (10.5 g) and HCl (2 M, 46.14 g) with stirring at 40 °C. After a clear homogeneous solution obtained, a pre-prepared homogeneous mixture of ionic liquid 1,3-bis(trimethoxysilylpropyl) imidazolium chloride (2 mmol, 0.86 g) and tetramethoxysilane (18 mmol, 2.74 g), in super-dry methanol was rapidly added and stirred at the same temperature for 24 h. The temperature of resulting mixture was then raised to 100 °C and the content of flask was statically maintained at this temperature for 72 h. The obtained solid

<sup>1</sup> B. Karimi, D. Elhamifar, J. H. Clark, and A. J. Hunt, *Chem. Eur. J.*, 2010, **16**, 8047 – 8053.

material containing surfactant was filtered, washed completely with deionized water, and dried at room temperature. The surfactant residue was then extracted from the materials through a Soxhlet apparatus by using ethanol (100 ml) and concentrate HCl (37%, 3 ml) for 24h.

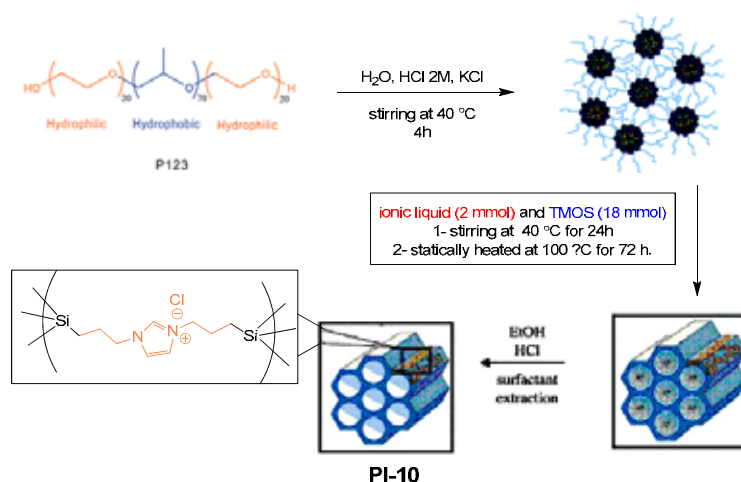

### 1-3- General procedure for synthesis of PMO-IL-AMP

We used of grafting method for functionalized of PMO-IL with amine group.<sup>2</sup> Which is as follows: 3 g of synthesized PMO-IL was mixed and refluxed with 3-aminopropyltrimethoxysilane (1 mmol, 0.23 mL) in dry toluene for 18 h under argon atmosphere. The white solid materials were filtered and washed with toluene and ethanol in order to remove of ungrafted 3-aminopropyltrimethoxysilane. The material was then dried in oven at 105 °C to give the PMO-IL-AMP at a loading of 0.35 mmol g<sup>-1</sup> as determined by thermogravimetric analysis and confirmed by elemental analysis.

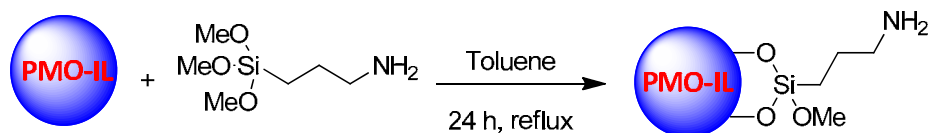

### 1-4- General procedure for synthesis of TEMPO@PMO-IL

Reductive amination has been used for synthesis of TEMPO@PMO-IL.<sup>2</sup> To a mixture of PMO-IL-AMP (3 g) in super dry CH<sub>3</sub>OH (50 mL), 4-Oxo-TEMPO (1.5 mmol, 0.281 g) was added. NaBH<sub>3</sub>CN (2 mmol, 0.125 g) was divided into three portions, the first part was added after 3 h, second part after 24 h and the third part after 48 h. The reaction mixture was stirred vigorously for 3 days at ambient temperature under argon atmosphere. The final product was separated by filtration and washed three times by water (20 ml), methanol (20 ml), and acetone (20 ml) and dried under vacuum at room temperature to give TEMPO@PMO-IL-Cl. The product stored in a refrigerator under inert atmosphere for the next uses.

<sup>2</sup> B. Karimi, A. Biglari, J. H. Clark, V. Budarin. *Angew. Chem.* **2007**, *119*, 7348–7351.

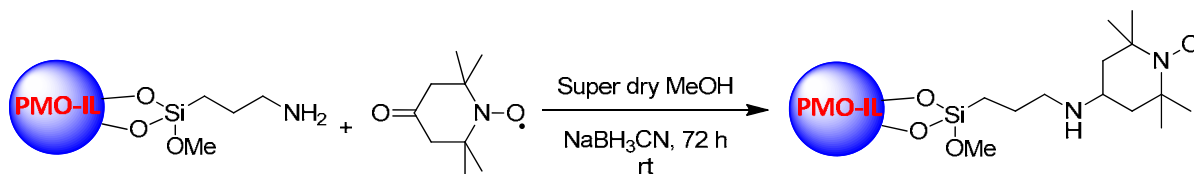

### 1-5-Typical procedure for ion exchange of chloride counter ion of ionic liquid by bromide anion

In a typical experiment, a suspension of TEMPO@PMO-IL-Cl (2 g) in saturated aqueous solution of NaBr (25 ml) was stirred at ambient temperature for 24 h. The final product was separated by filtration and thoroughly washed with deionized water (6×50 ml) and acetone (25 ml), respectively, to remove the generated NaCl and the excess of NaBr the material and dried under vacuum to give TEMPO@PMO-IL-Br. The final product stored in a refrigerator under inert atmosphere.

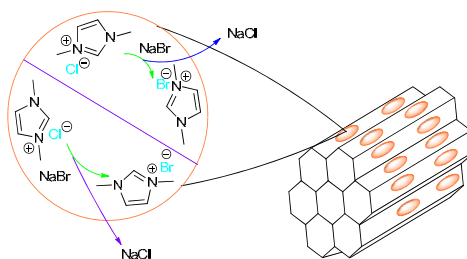

### 1-6- A typical catalytic procedure for oxidation of alcohols using TEMPO@PMO-IL-Br

A mixture of alcohol (1 mmol), TBN (10 mol%), AcOH (30 mg) and catalyst (1.5-2 mol%) in toluene (0.5-1 mL) was prepared in a flask and charged with pure oxygen (balloon filled, O<sub>2</sub> 1 atmosphere). The resulting mixture was stirred at 50 °C for the time indicated in Table 2. The progress of the reaction was monitored by GC. After completion of the reaction, the solution was diluted with ethylacetate and the catalyst was separated by centrifuge. The resulting solution was then dried with sodium sulfate and the excess solvent was removed under reduced pressure to give the corresponding carbonyl compounds. The purity of the products was analyzed by GC or NMR without any chromatographic purification.

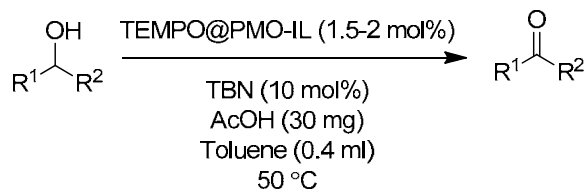

## 2- Characterizations of catalyst

The PMO-IL, PMO-IL-AMP and TEMPO@PMO-IL-Br were further characterized by IR, TEM, TGA, EPR, SAXC and surface pore analysis.

### 2-1- Instrument

The pore structures of the prepared materials were observed by transmission electron microscopy (Philips CM-200) and were verified further by the nitrogen sorption analysis. N<sub>2</sub> adsorption isotherms were measured at 77 K on Belsorp (BELMAX, Japan) analyzer using standard continuous procedures, and samples were first degassed at 353 K for 5 h. Specific surface area was determined from the linear part of the BET plot ( $P/P_0 \approx 0.05-0.15$ ), the pore size distribution was calculated from the adsorption branch using Barrett–Joyner–Halenda (BJH) method, total pore volume was estimated based on the N<sub>2</sub> adsorbed at  $P/P_0 \approx 0.995$ . Thermogravimetric analysis was conducted from room temperature to 800 °C in an oxygen flow using a NETZSCH STA 409 PC/PG instrument. FT-IR spectra were recorded using a Bruker Vector 22 instrument after mixing the samples with KBr. Gas chromatography analyses were performed on Varian CP-3800 using a flame ionization detector (FID) using suitable internal standards. NMR spectra were recorded using a Bruker (<sup>1</sup>H frequency: 400 MHz).

### 2-2- FT-IR spectroscopy

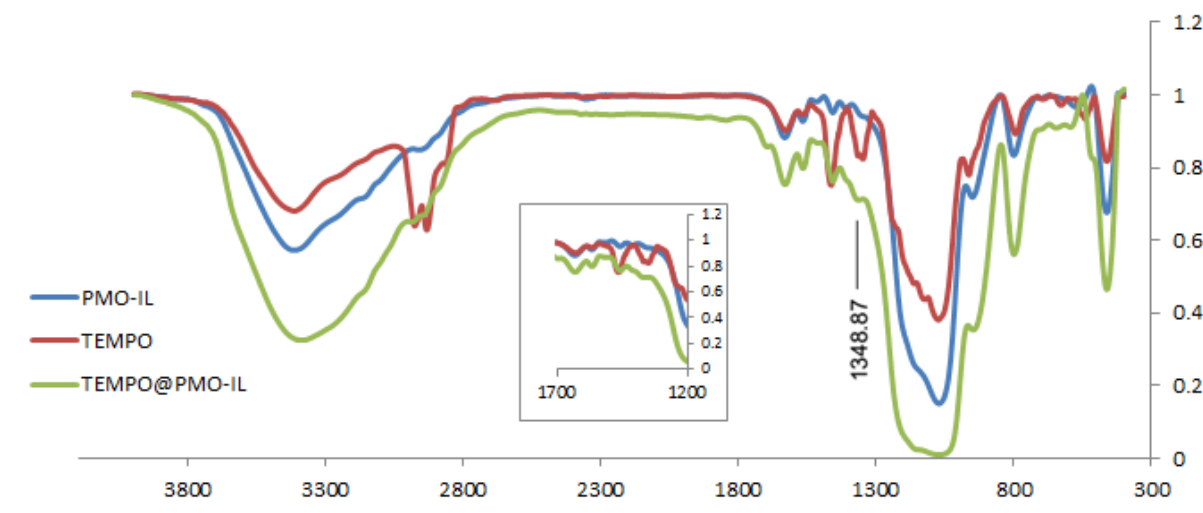

**Fig. S1.** FT-IR spectroscopy of PMO-IL, TEMPO and TEMPO@PMO-IL-Br

### 2-3- TEM image

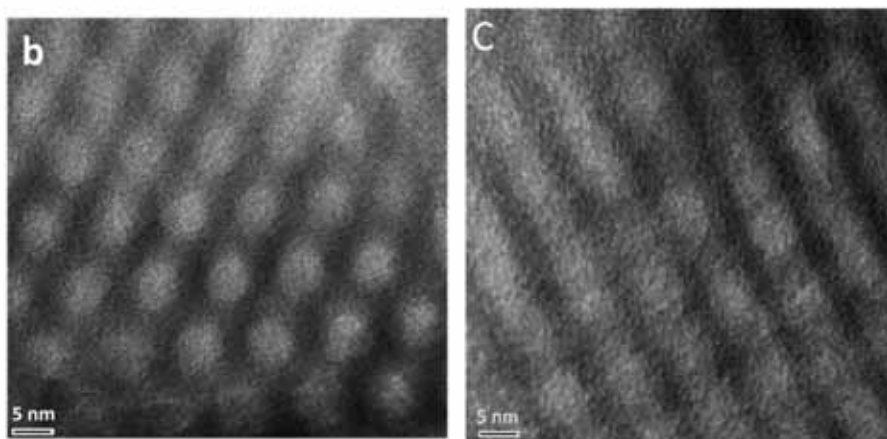

Fig. S2. TEM image of fresh TEMPO@PMO-IL-Br and after recycling from 8<sup>th</sup> (Scale bar: 5 nm)

### 2-4- TGA analysis of PMO-IL, PMO-IL-AMP and TEMPO@PMO-IL-Br

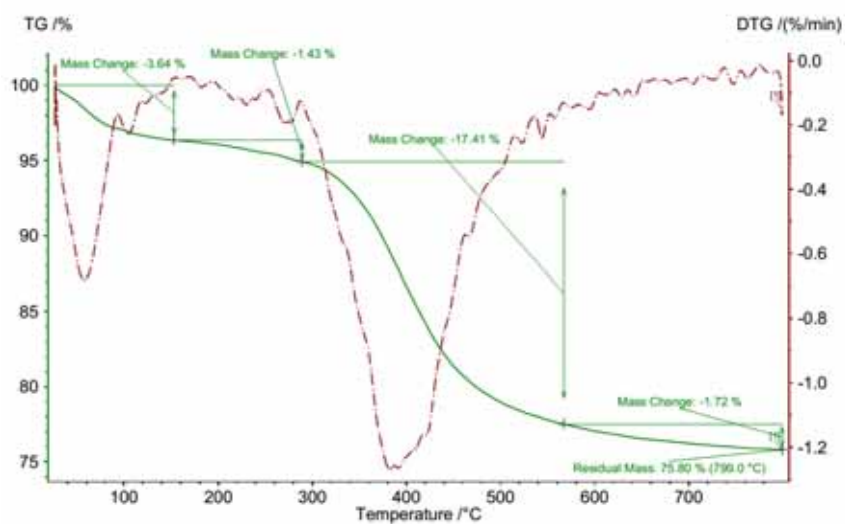

Fig. S3. TGA analysis of PMO-IL under O<sub>2</sub> flow

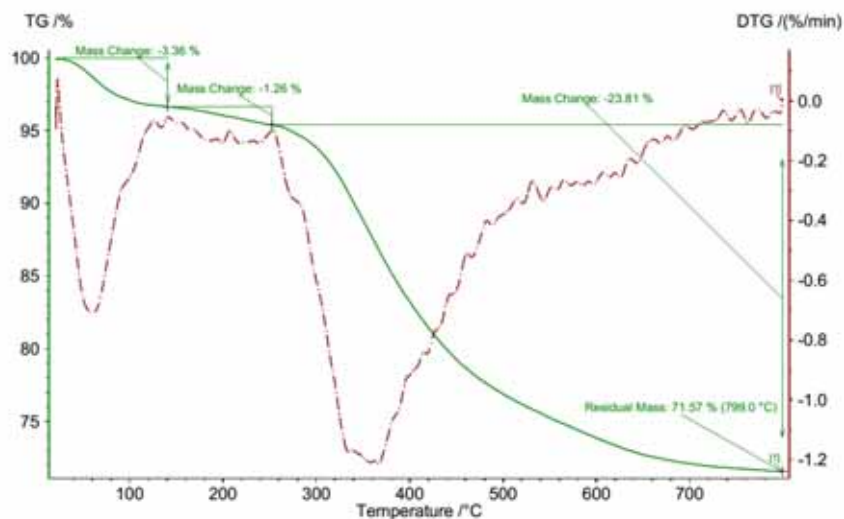

Fig. S4. TGA analysis of PMO-IL-AMP under O<sub>2</sub> flow

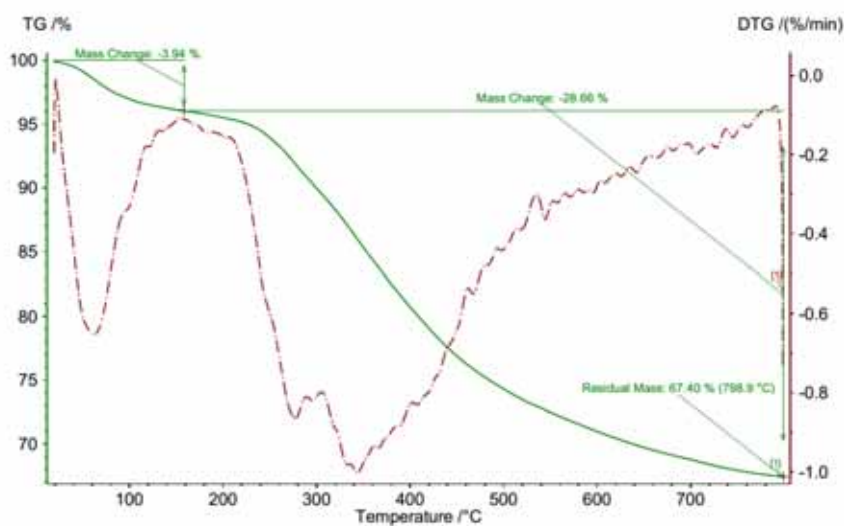

Fig. S5. TGA analysis of TEMPO@PMO-IL catalyst under O<sub>2</sub> flow

## 2-5- Small angle X-ray scattering (SAXC) of TEMPO@PMO-IL-Br

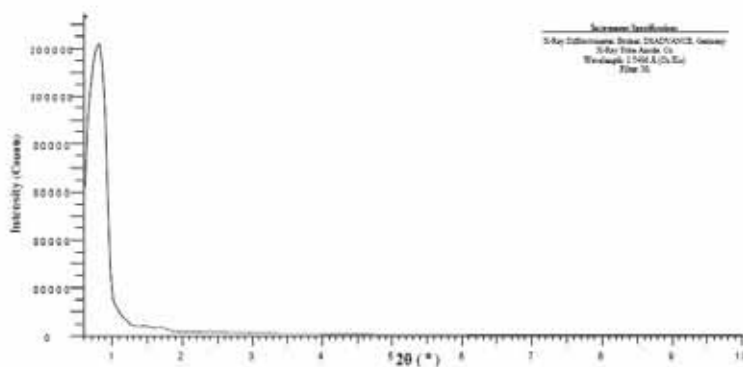

Fig. S6. Small angle X-ray scattering (SAXC) of TEMPO@PMO-IL-Br

## 2-6- Solid state EPR spectrum of TEMPO@PMO-IL-Br

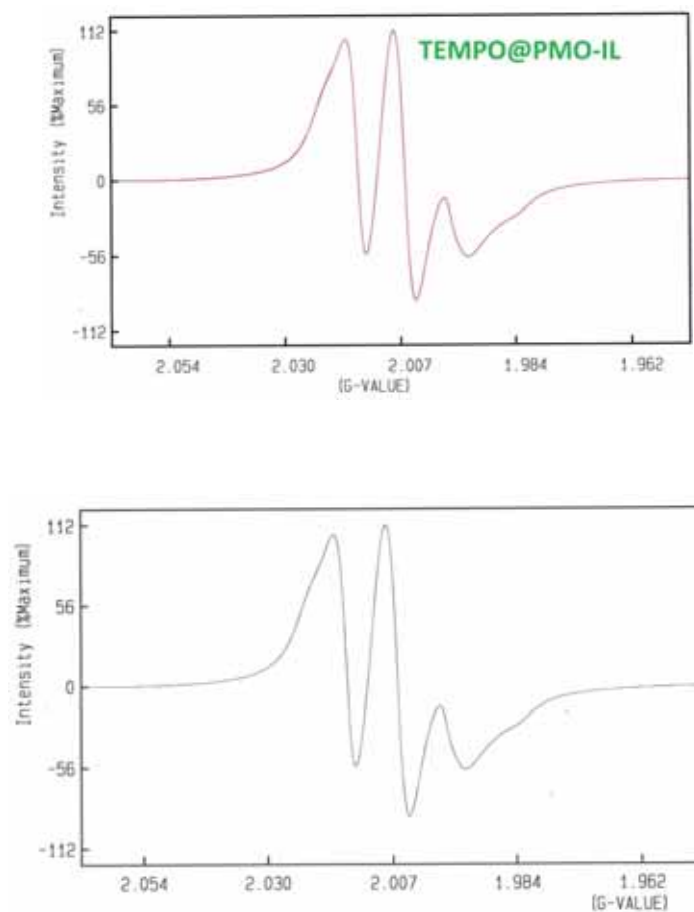

Fig. S7. Solid state EPR spectrum of TEMPO@PMO-IL-Br

## 2-7- Elemental Analysis (CHN analysis)

Table S1. Elementary analysis of the materials

|              | N%   | C%    | H%   |
|--------------|------|-------|------|
| PMO-IL       | 2.97 | 14.29 | 2.87 |
| PMO-IL-AMP   | 4.36 | 14.76 | 2.92 |
| TEMPO@PMO-IL | 4.40 | 18.80 | 2.87 |

## 2-8- N<sub>2</sub> adsorption-desorption analyses of PMO-IL, PMO-IL-AMP, TEMPO@PMO-IL and recovered TEMPO@PMO-IL

N<sub>2</sub> adsorption analysis for all materials (PMO-IL, PMO-IL-AMP and TEMPO@PMO-IL) showed a typical type-IV isotherm pattern from P/P<sub>0</sub>= 0.6-0.8 with a sharp hysteresis loop which is characteristic of highly ordered mesoporous materials and narrow pore size distribution with 2-dimensional hexagonal pore structure .



The nitrogen adsorption-desorption experiments showed the BET surface area of  $578.8 \text{ m}^2 \text{ g}^{-1}$  for starting PMO-IL,  $339.1 \text{ m}^2 \text{ g}^{-1}$  for PMO-IL-AMP and  $351.5 \text{ m}^2 \text{ g}^{-1}$  for TEMPO@PMO-IL. Moreover, the total pore volume of  $1.08 \text{ cm}^3 \text{ g}^{-1}$  for PMO-IL,  $0.79 \text{ cm}^3 \text{ g}^{-1}$  for PMO-IL-AMP,  $0.77 \text{ cm}^3 \text{ g}^{-1}$  for TEMPO@PMO-IL, and also BJH showed average pore diameters of  $8.5 \text{ nm}$  for PMO-IL, PMO-IL-AMP and TEMPO@PMO-IL.

The  $\text{N}_2$  adsorption analysis of the recovered catalyst showed very similar isotherms to those of the fresh catalyst TEMPO@PMO-IL. The  $\text{N}_2$  sorption diagram of the recovered catalyst TEMPO@PMO-IL interestingly showed a type-IV isotherm with relatively sharp hysteresis loop, which indicates that the high-ordered mesostructures have survived.

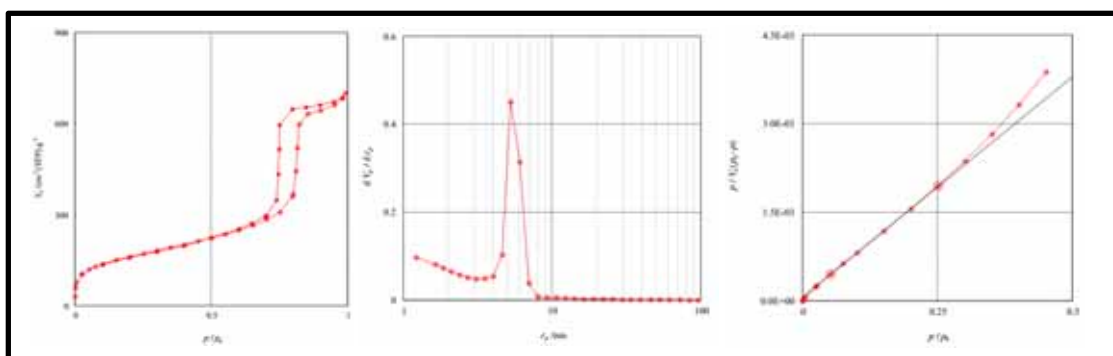

**Fig S8.**  $\text{N}_2$  adsorption-desorption isotherm, BJH average pore size diagram and BET plot of PMO-IL

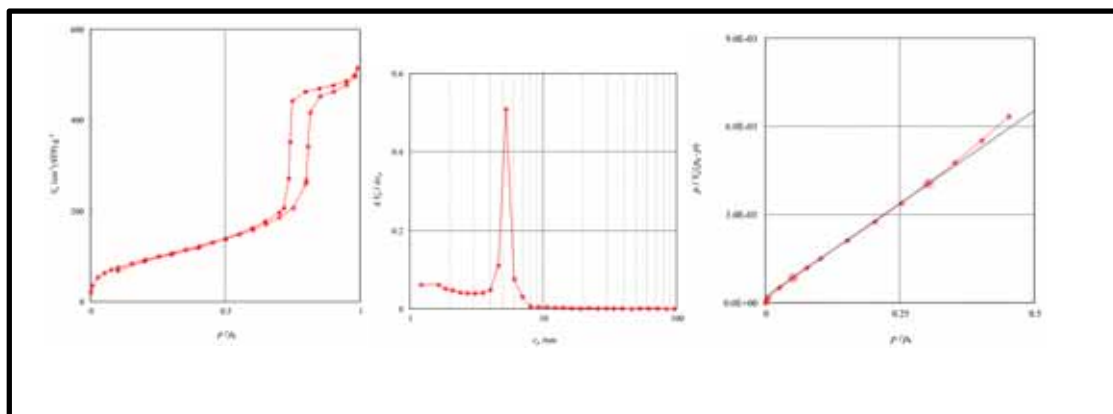

**Fig S9.**  $\text{N}_2$  adsorption-desorption isotherm, BJH average pore size diagram and BET plot of PMO-IL-AMP

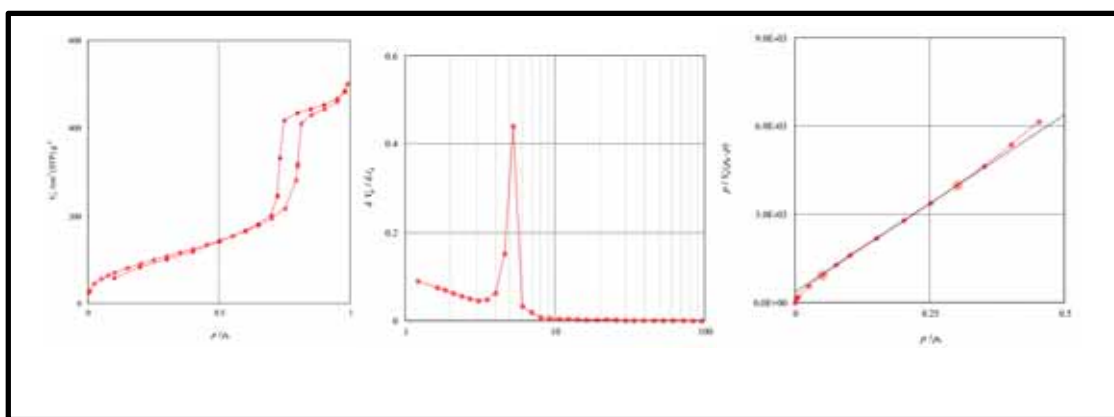

**Fig S10.** N<sub>2</sub> adsorption-desorption isotherm, BJH average pore size diagram and BET plot of TEMPO@PMO-IL-Br

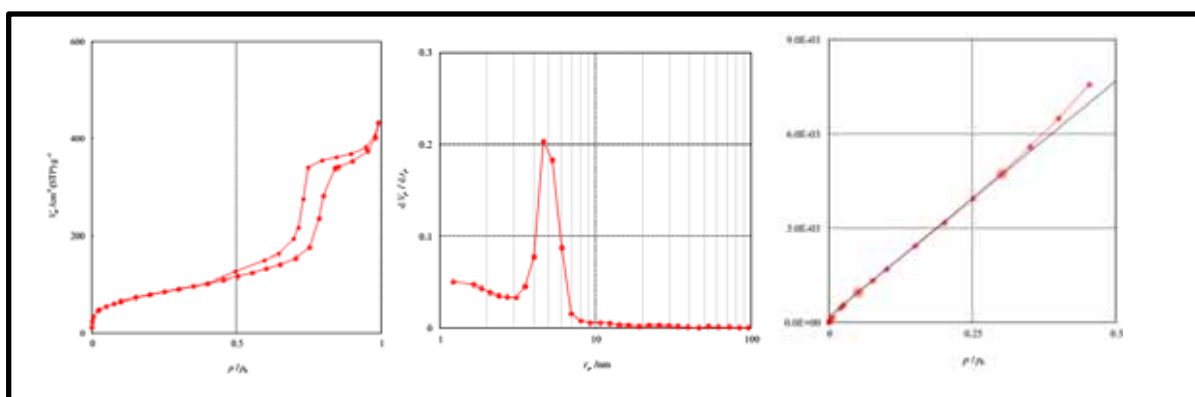

**Fig S11.** N<sub>2</sub> adsorption-desorption isotherm, BJH average pore size diagram and BET plot of recycled TEMPO@PMO-IL-Br after the 8<sup>th</sup> oxidation of benzyl alcohol

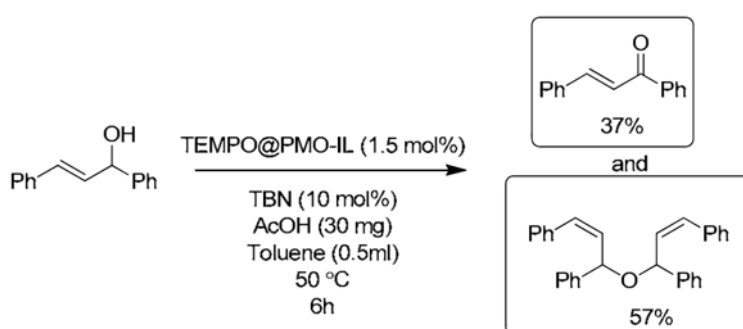

**Scheme S1.** Symmetrical ether formation in the aerobic oxidation of highly acid sensitive substrate (E)-1,3-diphenyl-2-propen-1-ol at the optimal condition

### 3- Some of the Gas chromatograms and NMR of oxidation of alcohols to ensure completion of reaction

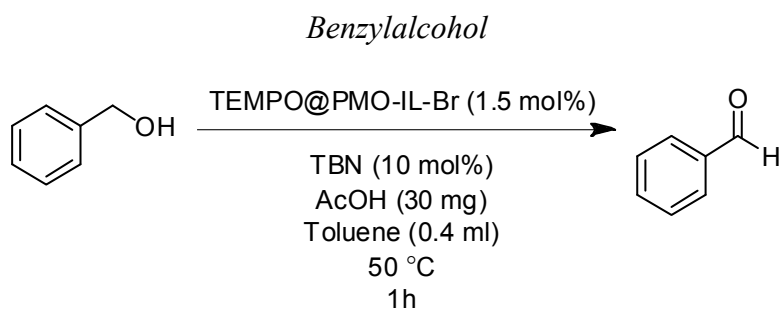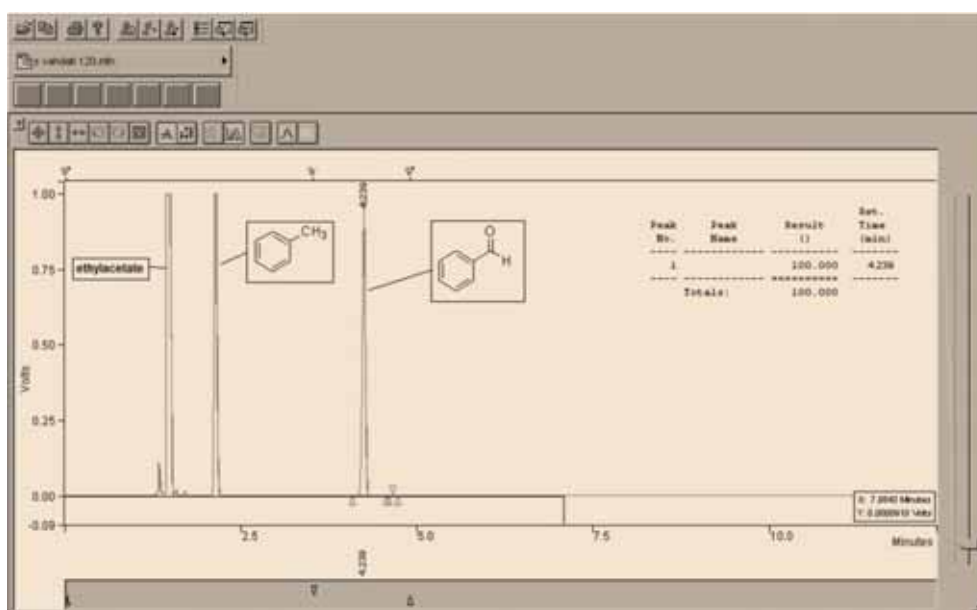

*Blank of Benzylalcohol*

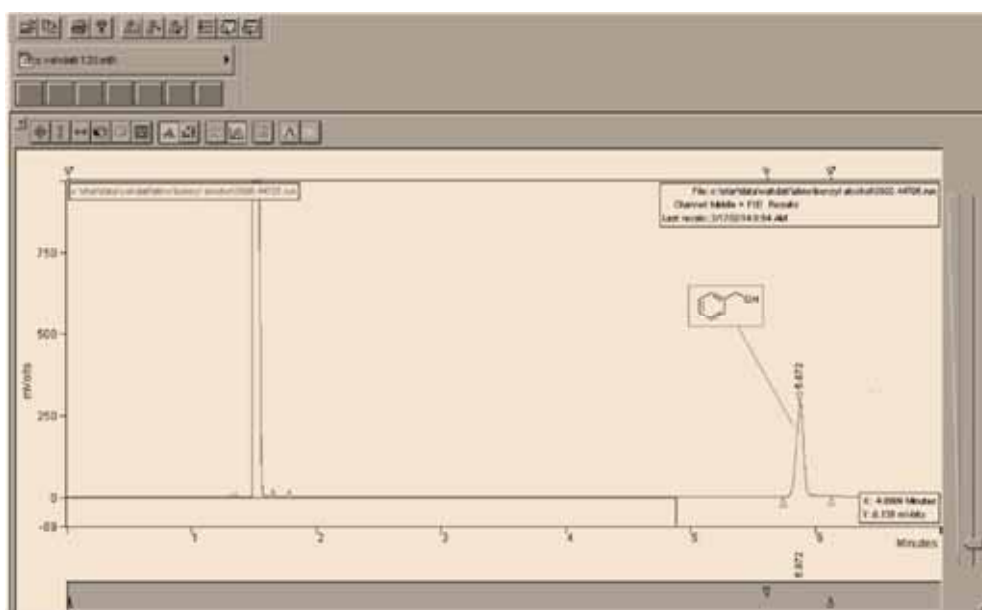

### 4-methoxybenzylalcohol

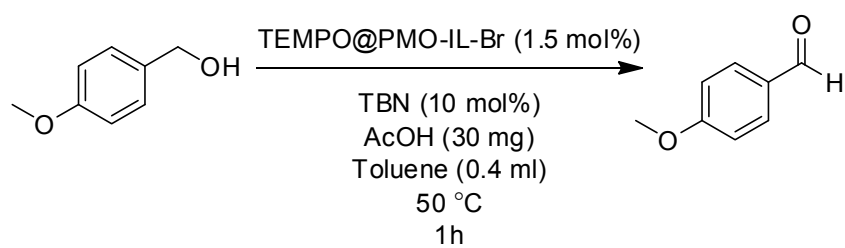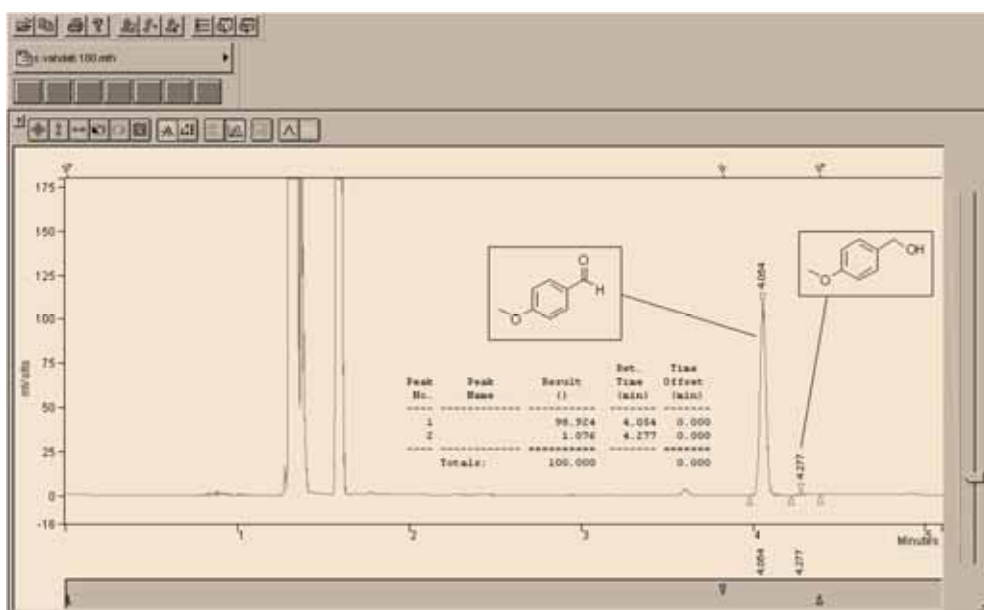

### Blank of 4-methoxybenzylalcohol

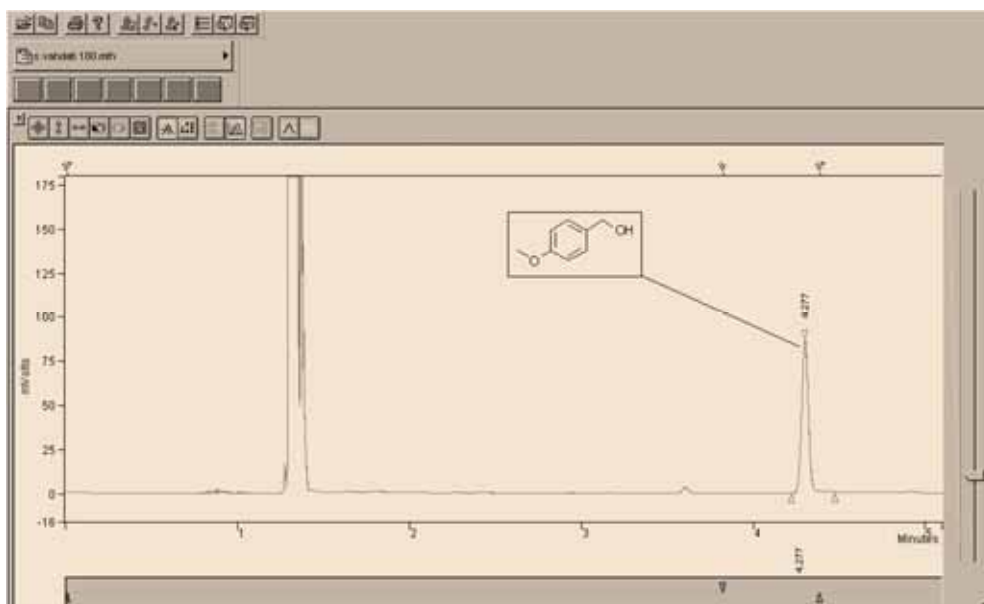

*1-phenyl-1-propanol*

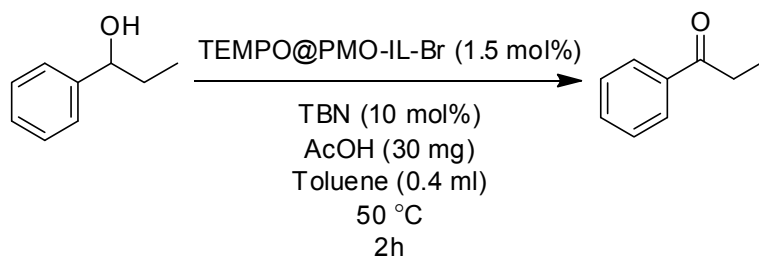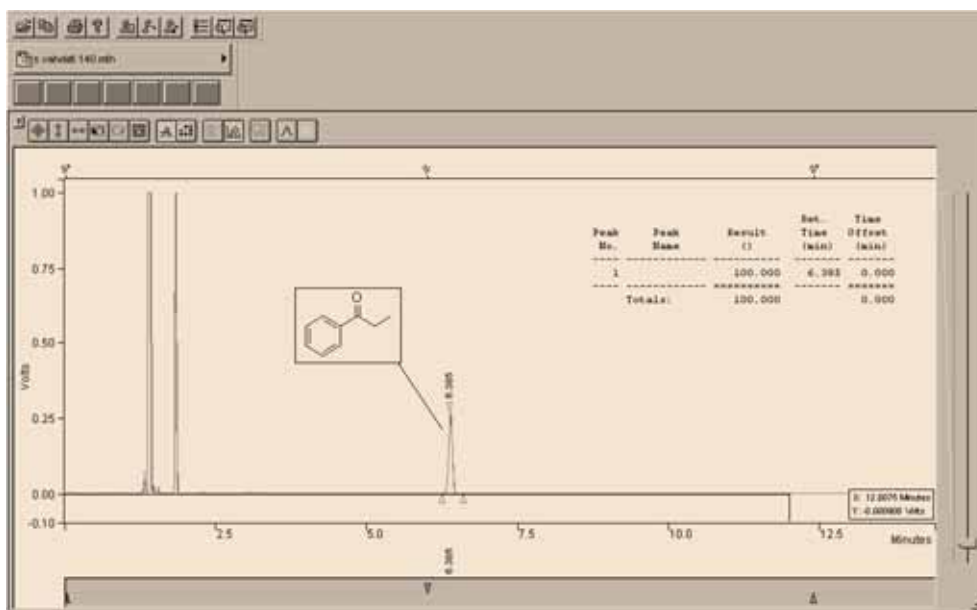

*Blank of 1-phenyl-1-propanol*

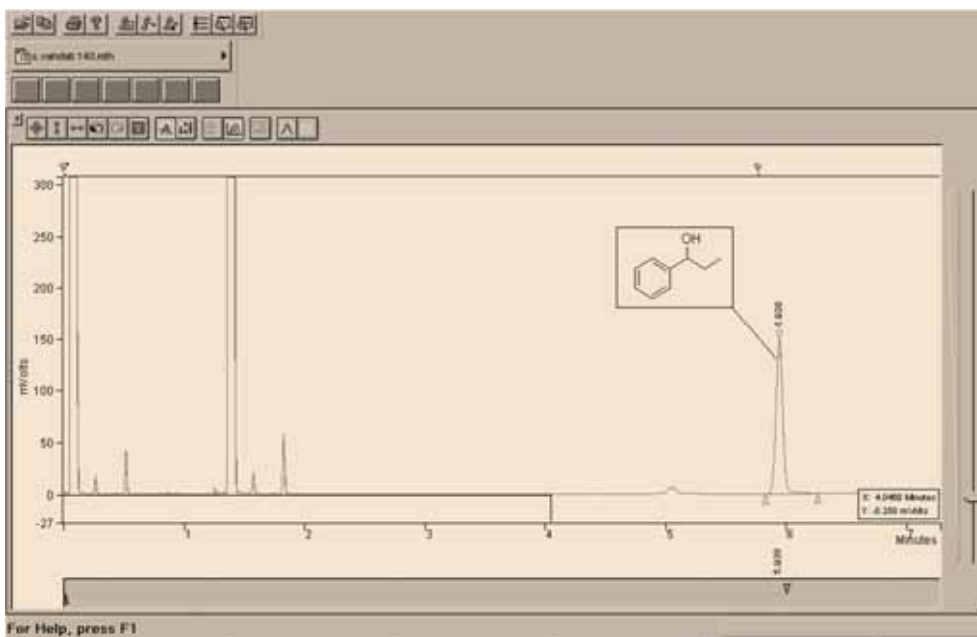

*1-phenyl-1-ethanol*

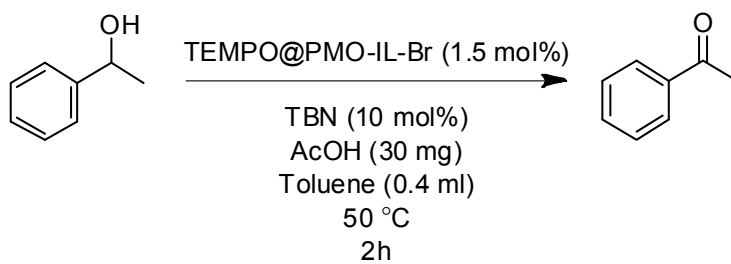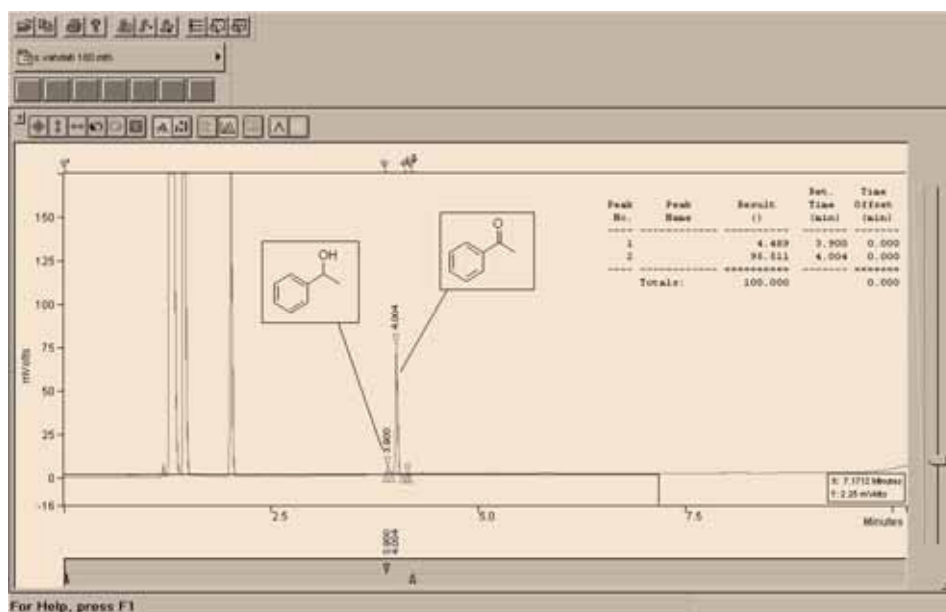

*Blank of 1-phenyl-1-ethanol*

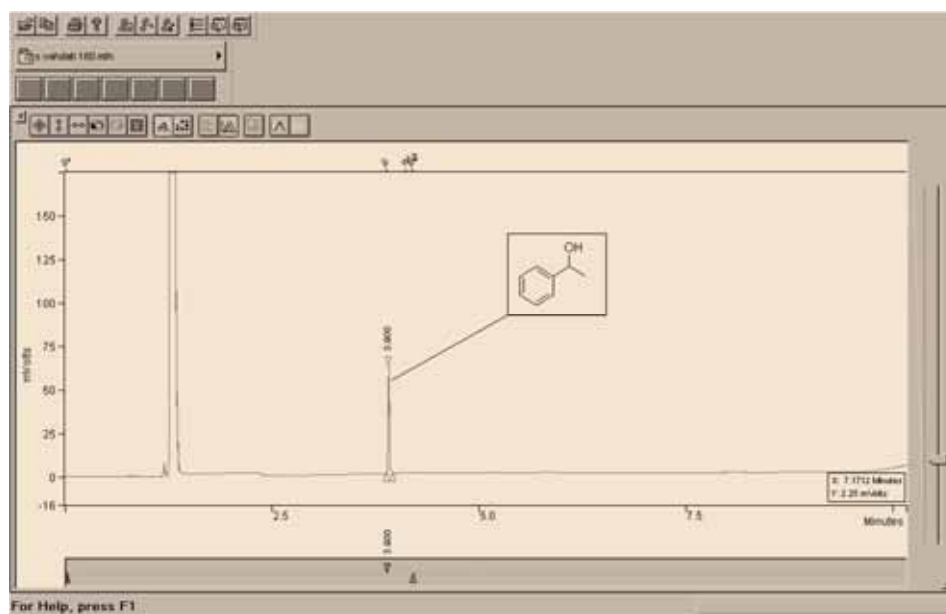

2,4-dichlorobenzylalcohol

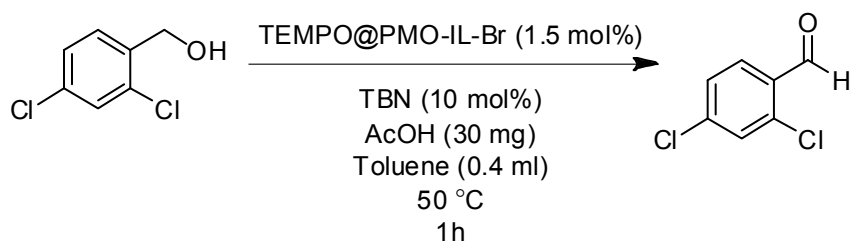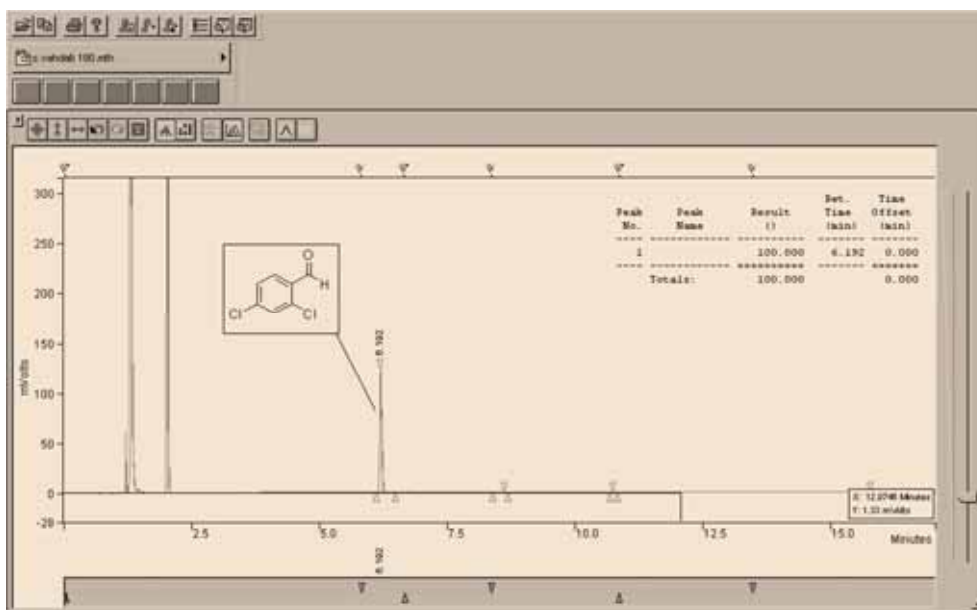

Blank of 2,4-dichlorobenzylalcohol

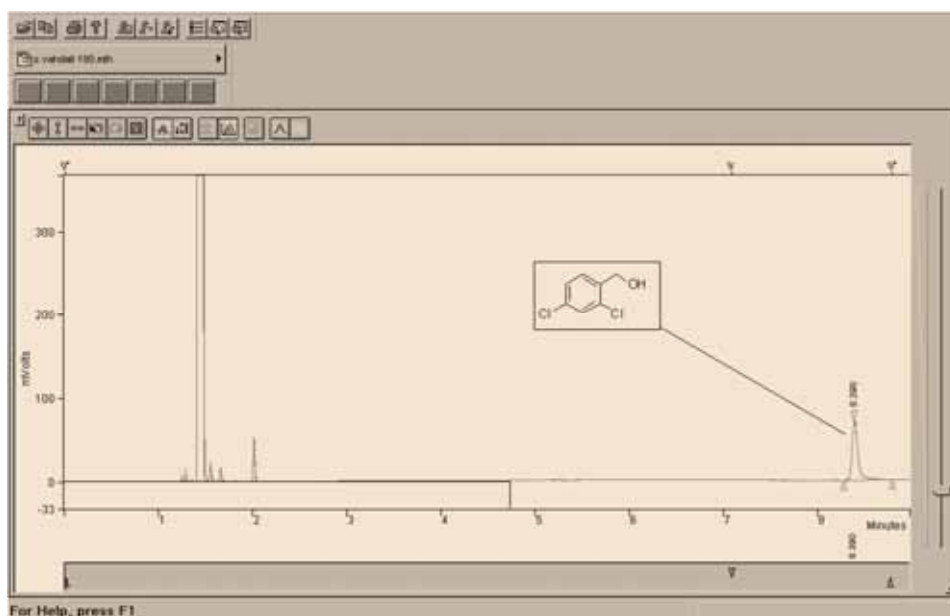

2,6-dichlorobenzylalcohol

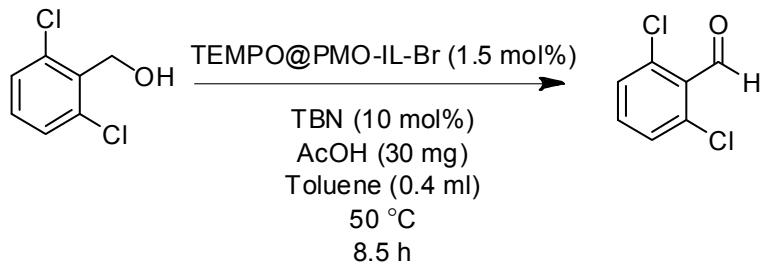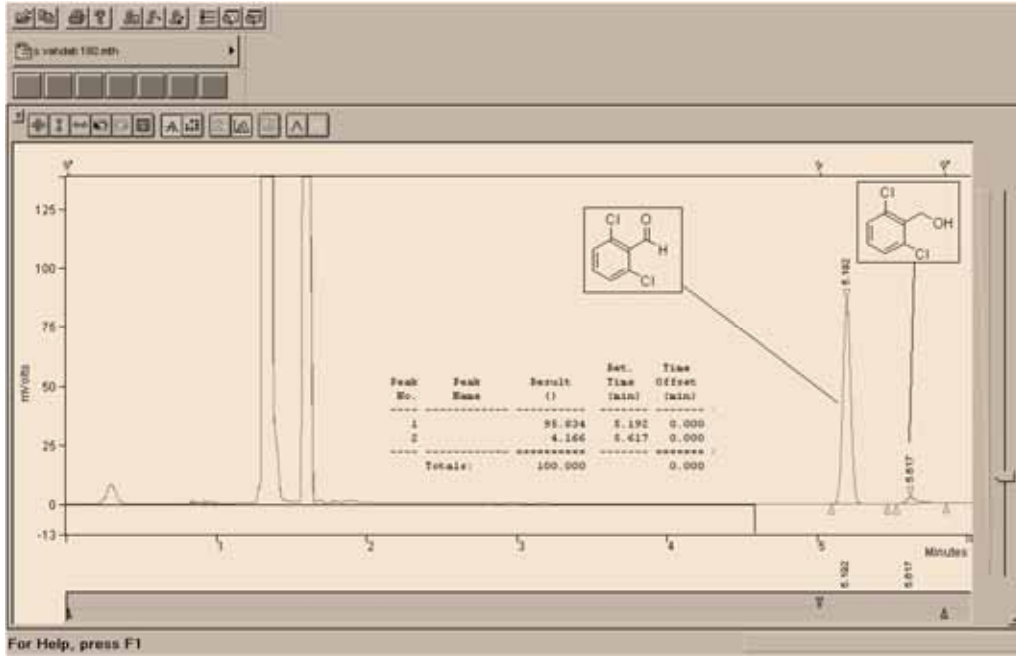

Blank of 2,6-dichlorobenzylalcohol

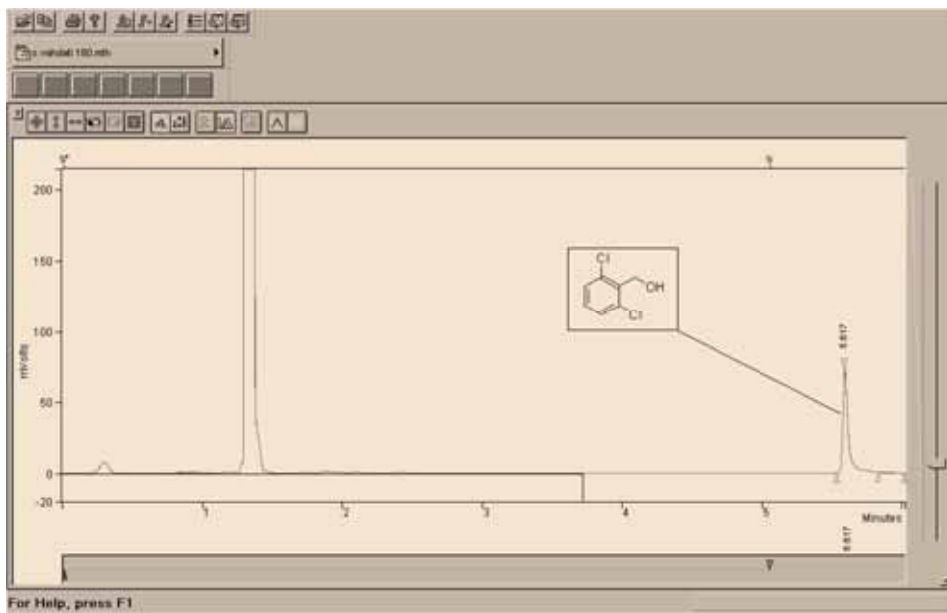



### 1-Decanol

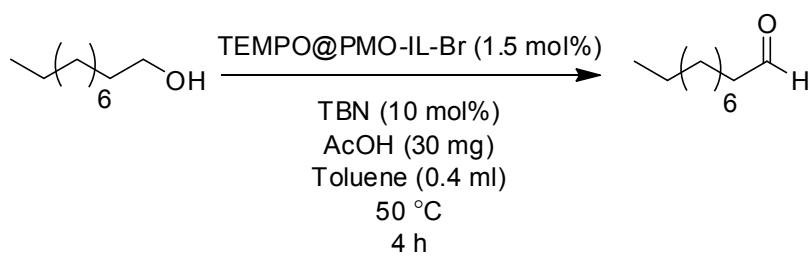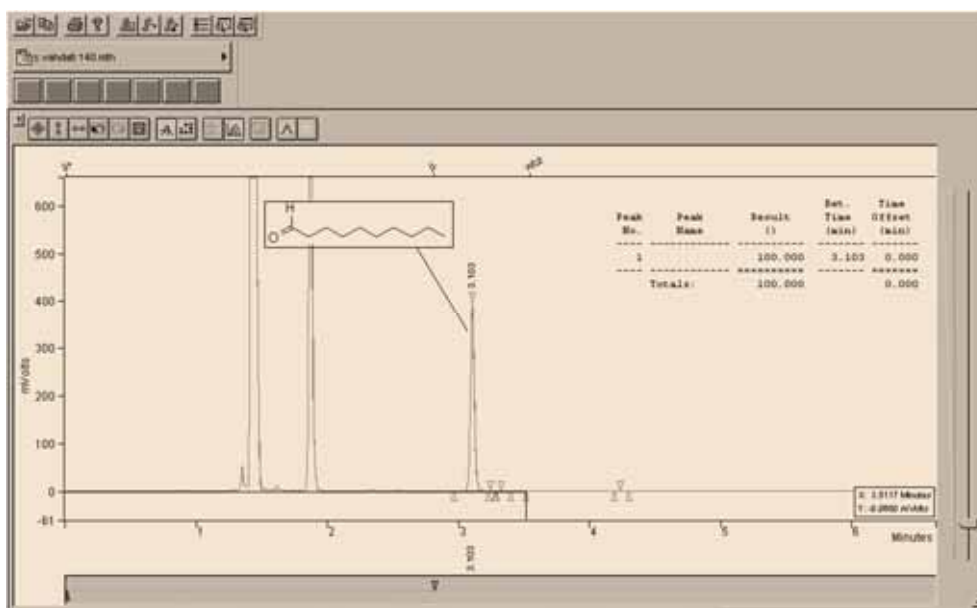

### Blank of 1-decanol

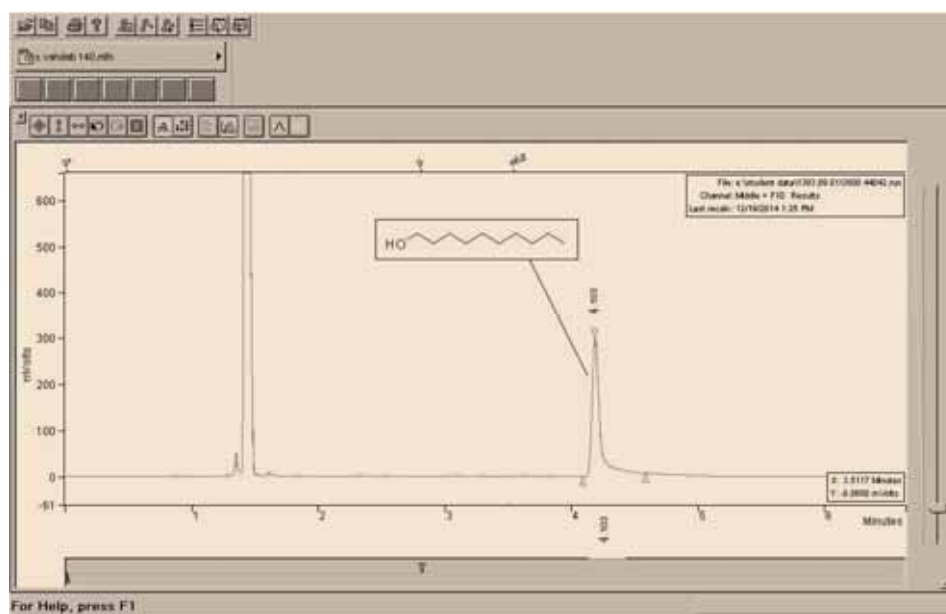

### 1-Dodecanol

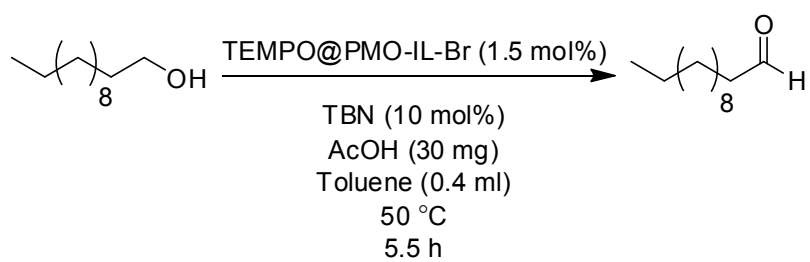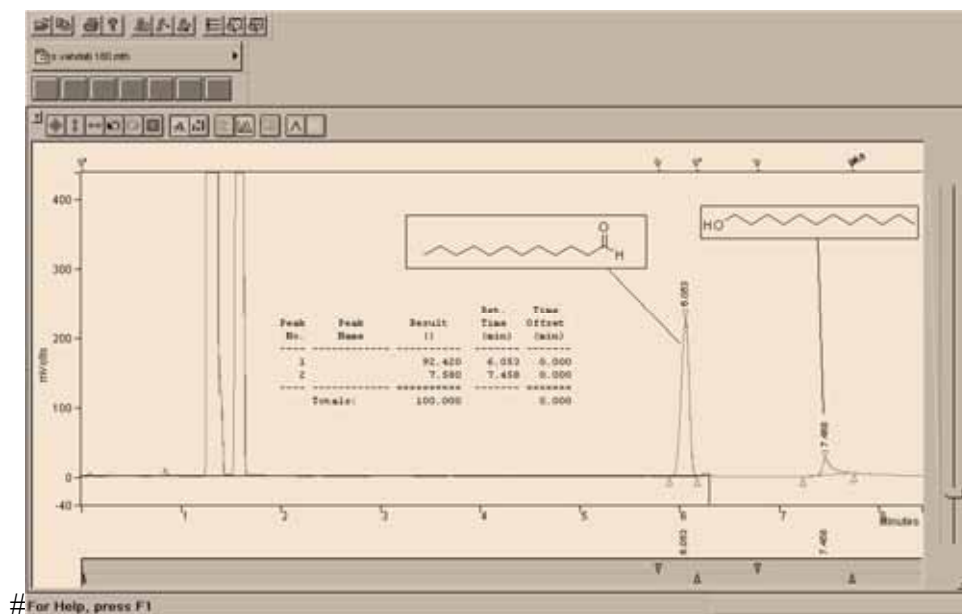

### Blank of 1-dodecanol

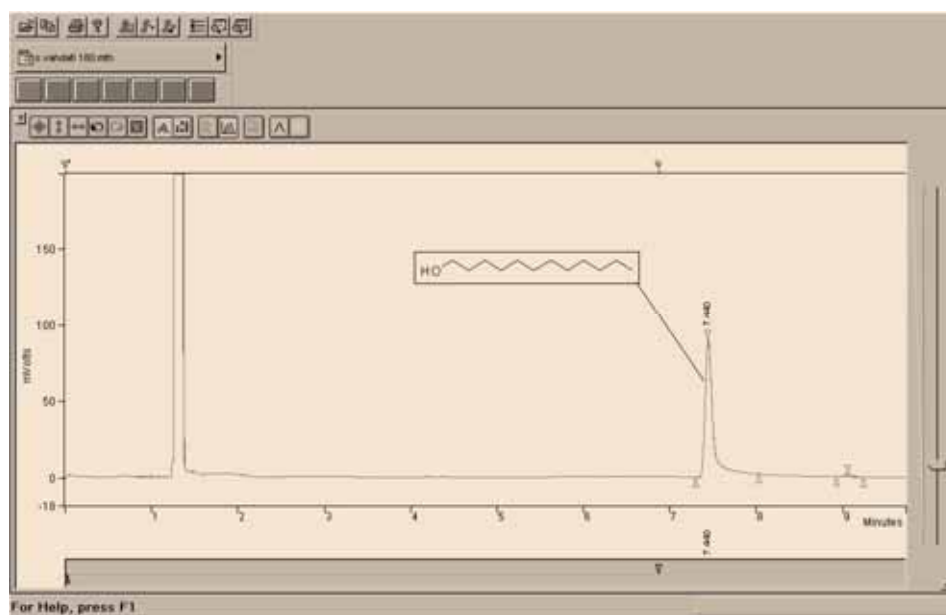

### 1-Heptanol

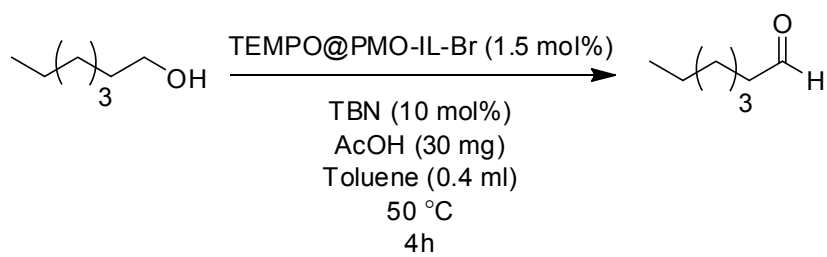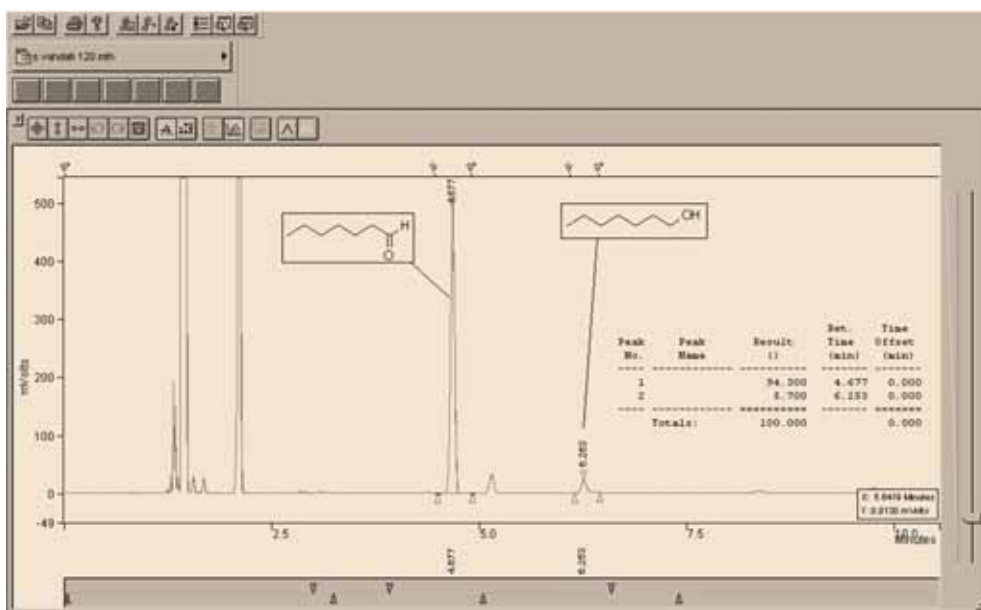

### Blank of 1-heptanol

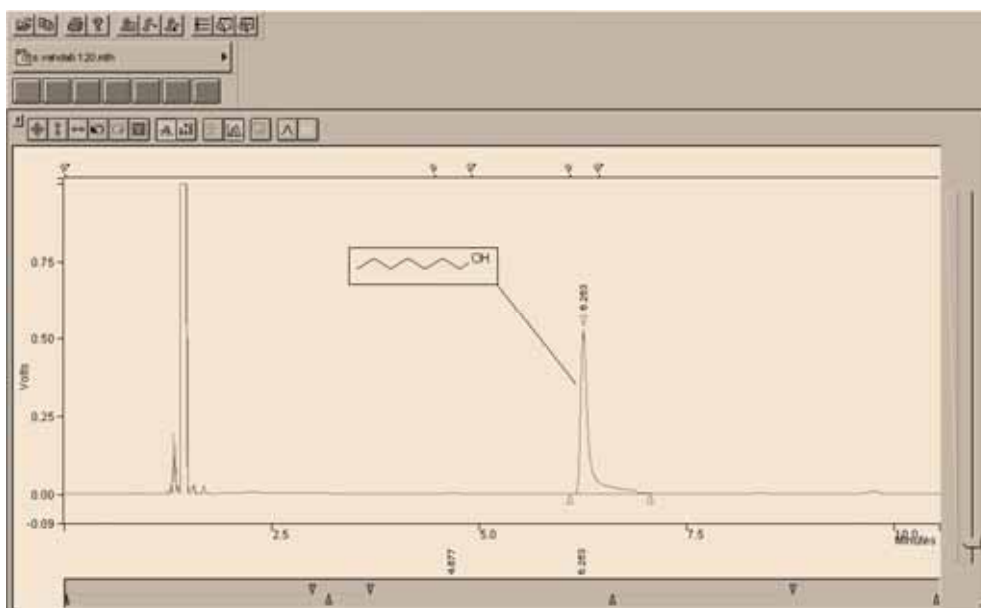

### 1-Octyn-3-ol

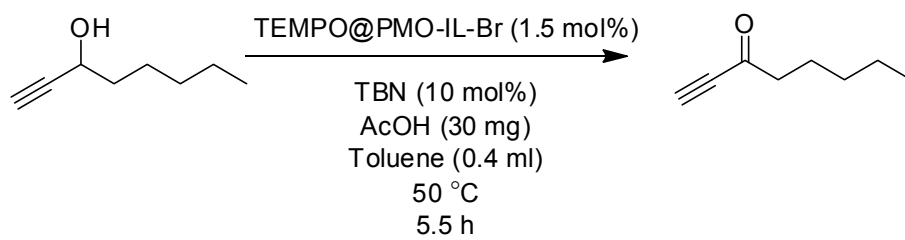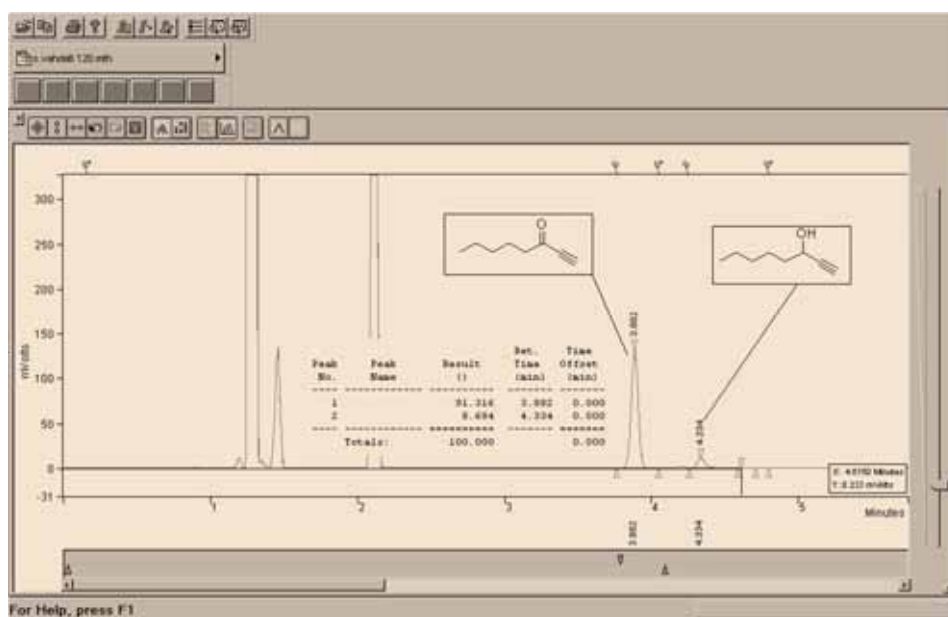

### Blank of 1-Octyn-3-ol

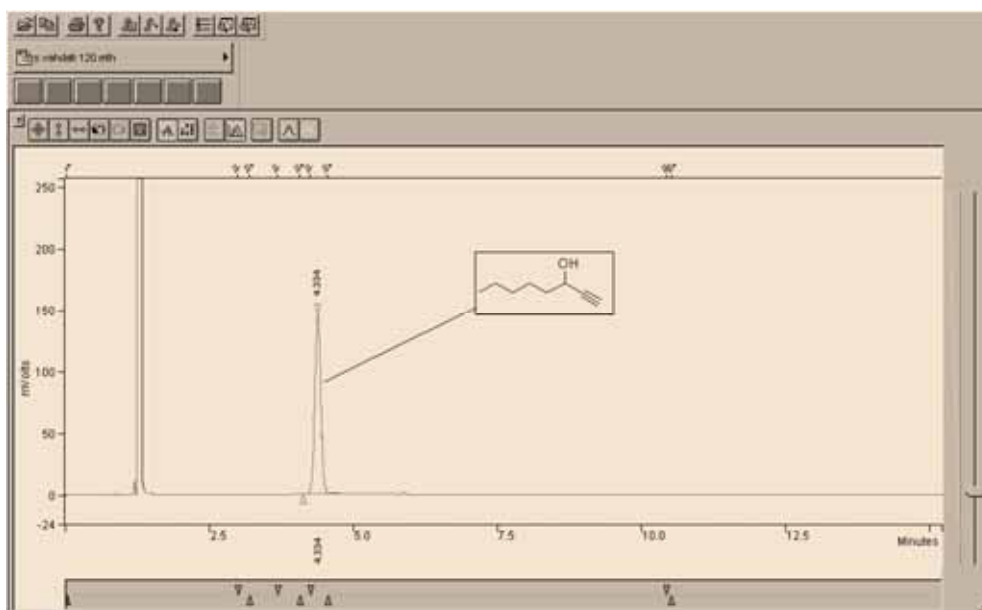

## 2-Adamantanol

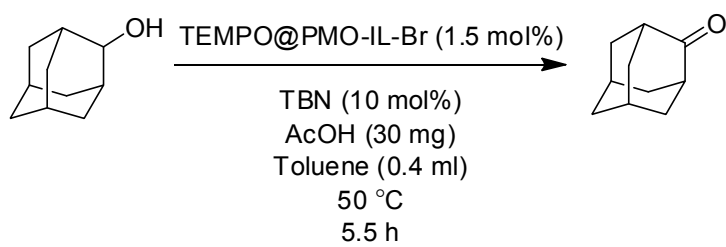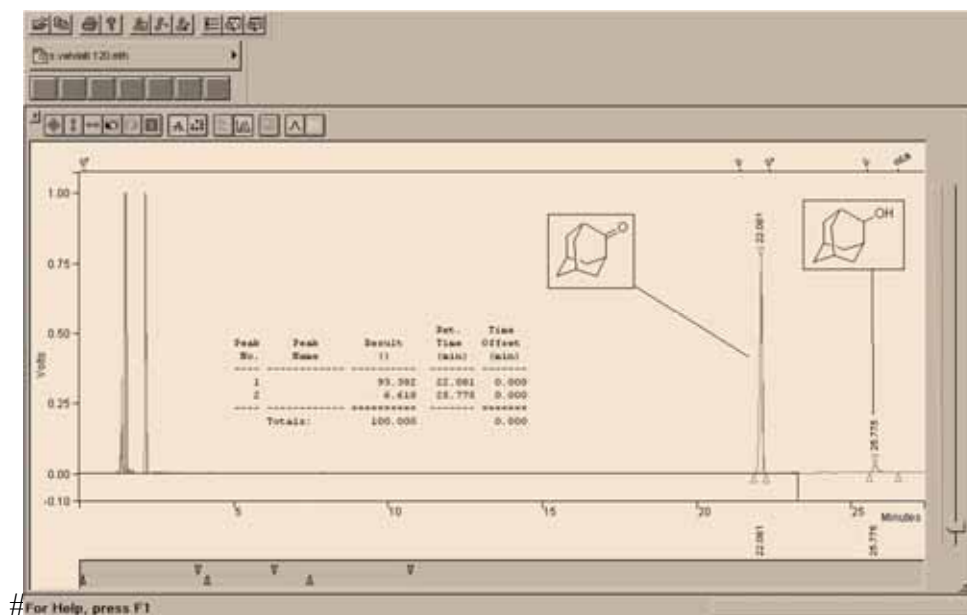

# For Help, press F1

## Blank of 2-adamentanol

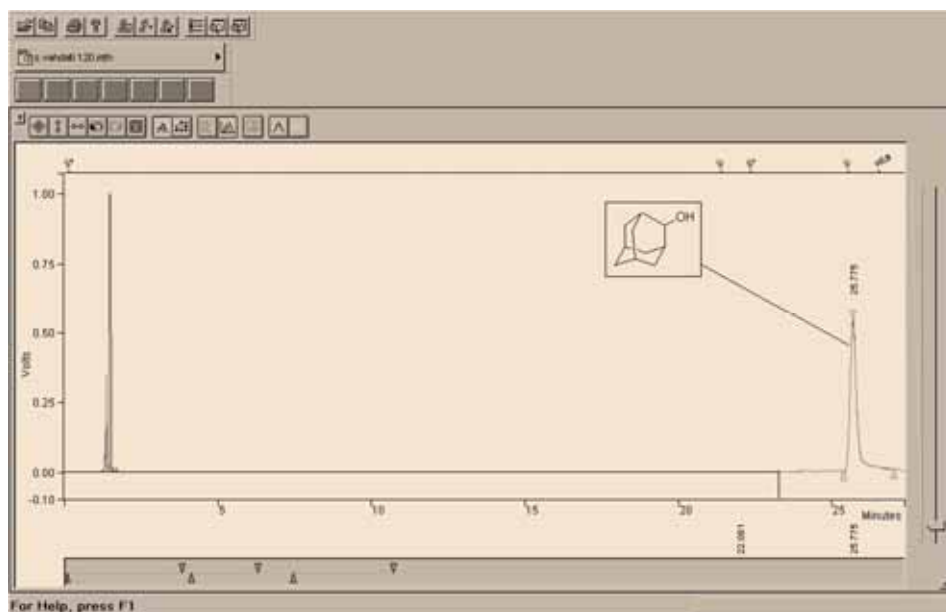

For Help, press F1

### Dicyclopropylcarbinol

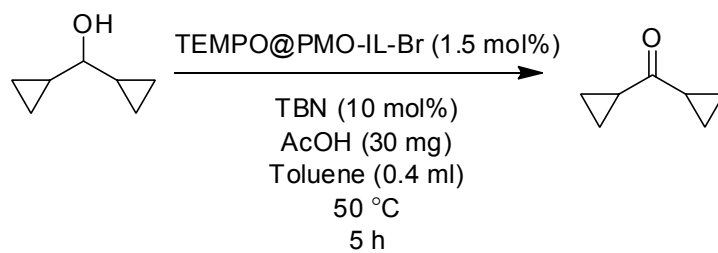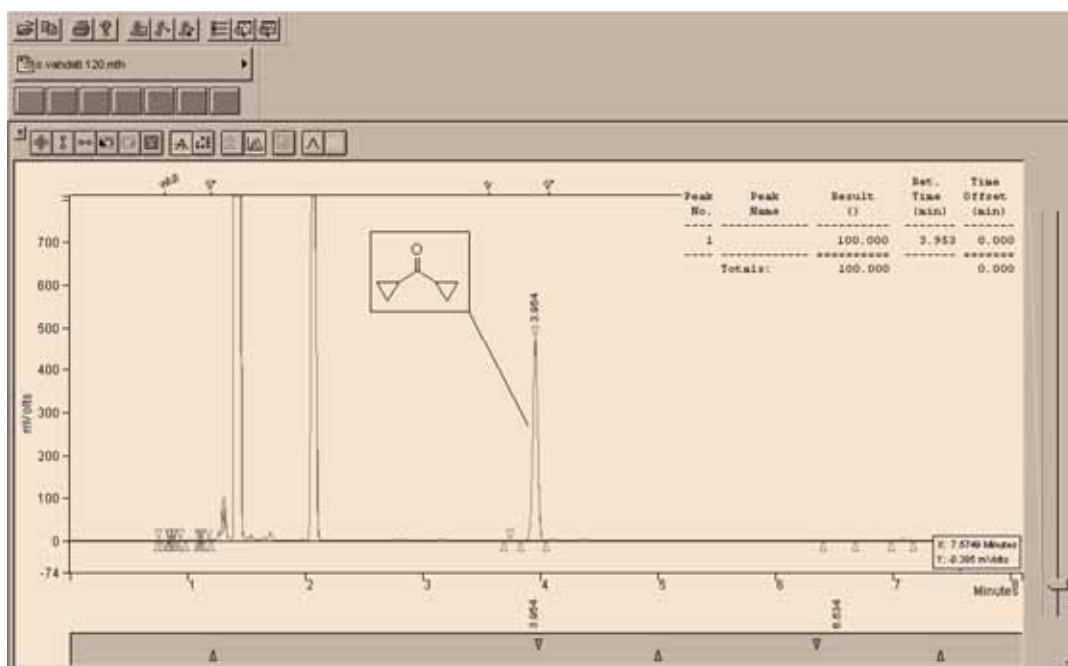

### Blank of Dicyclopropylcarbinol

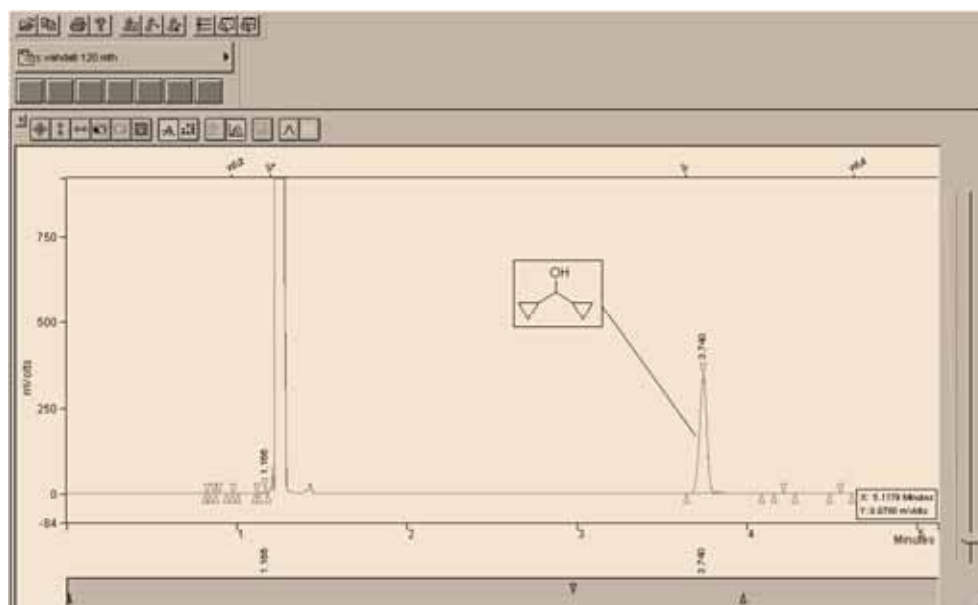

*5-(hydroxymethyl)furan-2-carbaldehyde*

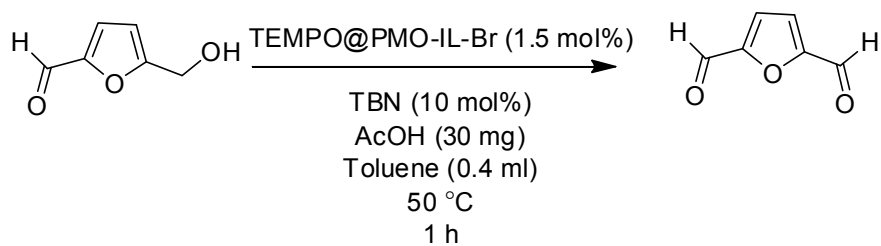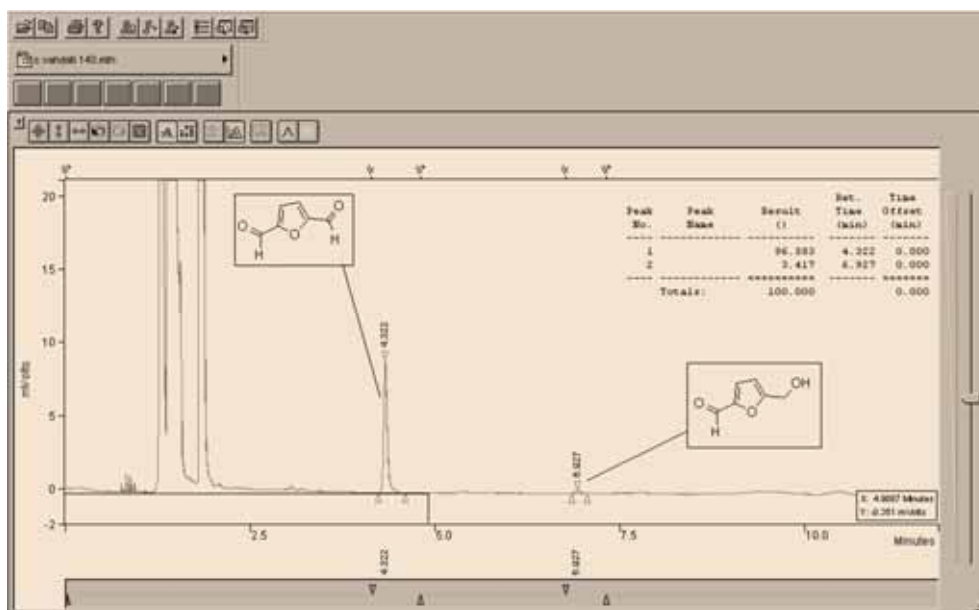

*Blank of 5-(hydroxymethyl)furan-2-carbaldehyde*

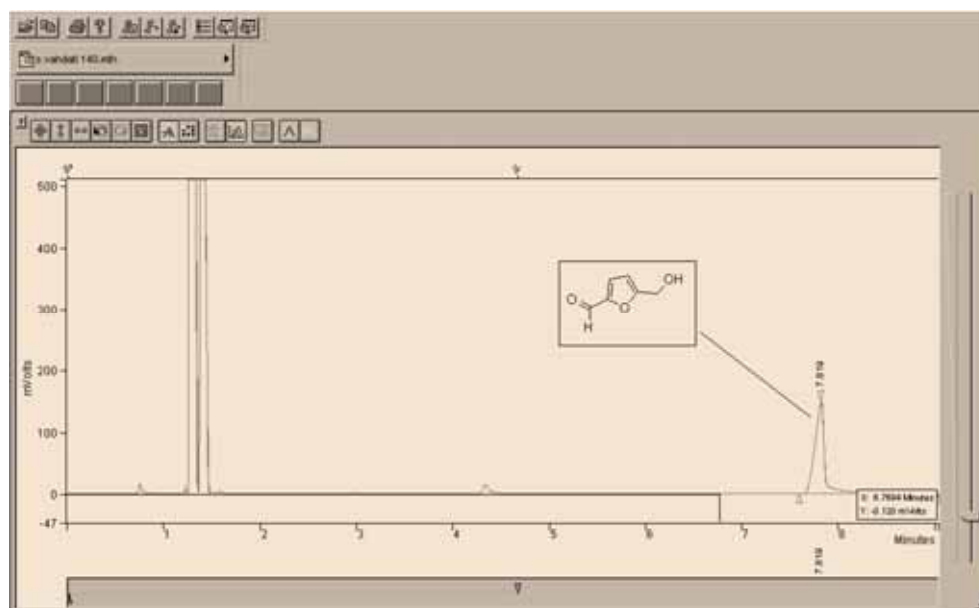

### Naphthalenyl-1-methanol

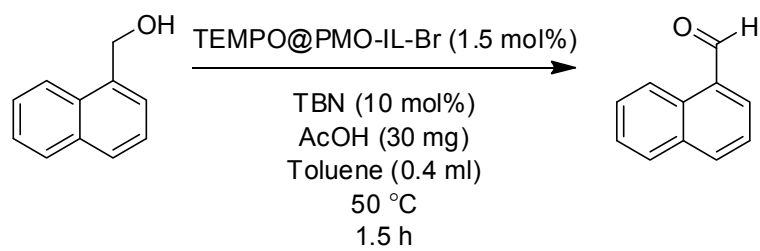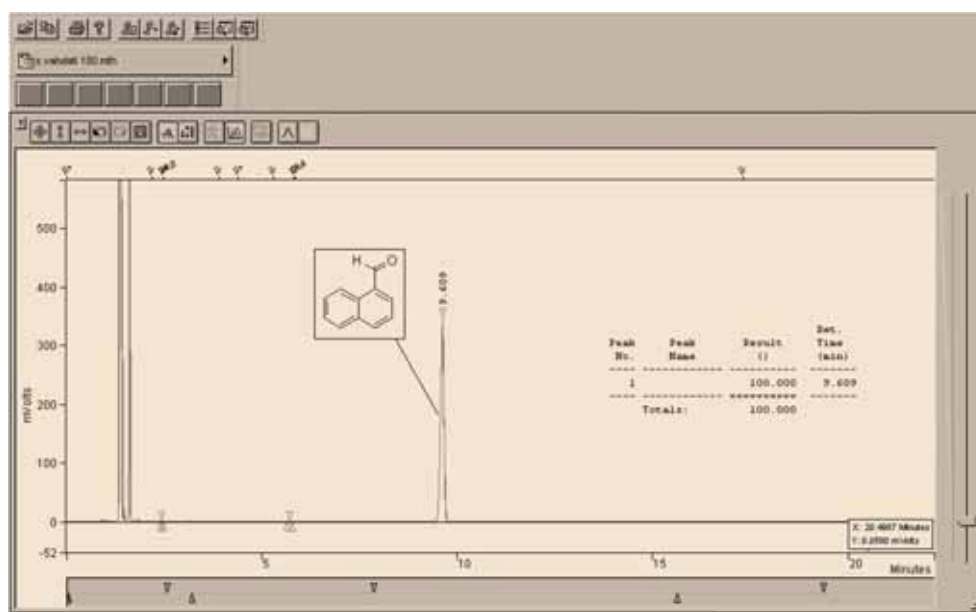

### Blank of naphthalenyl-1-methanol

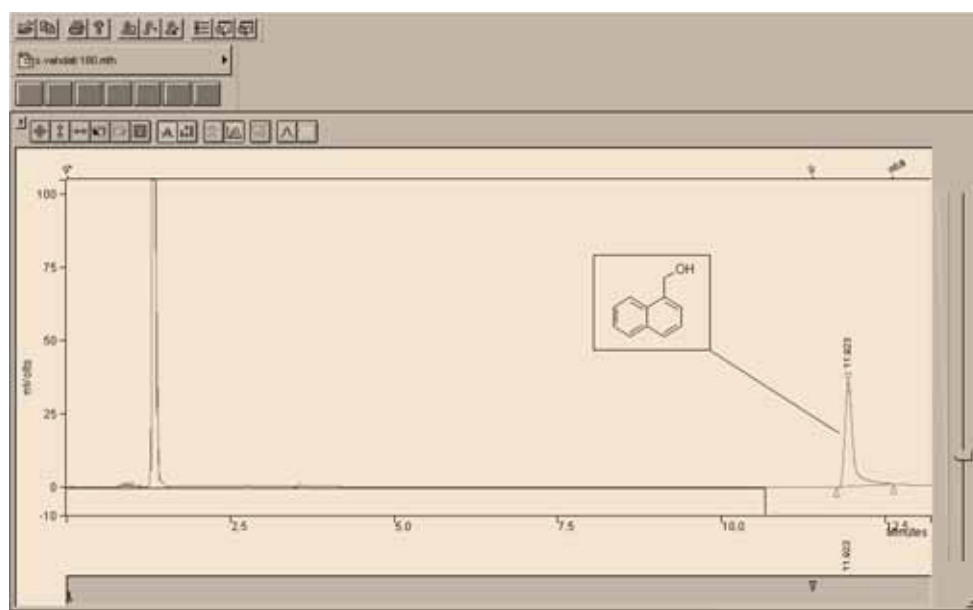



### 1-Indanol

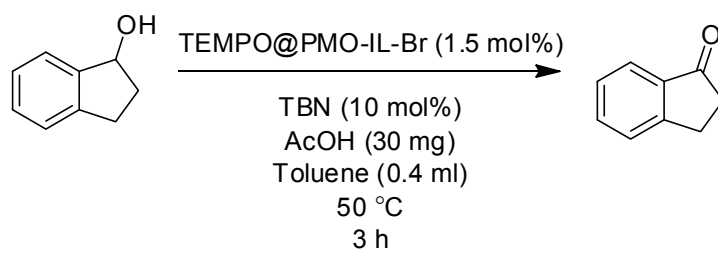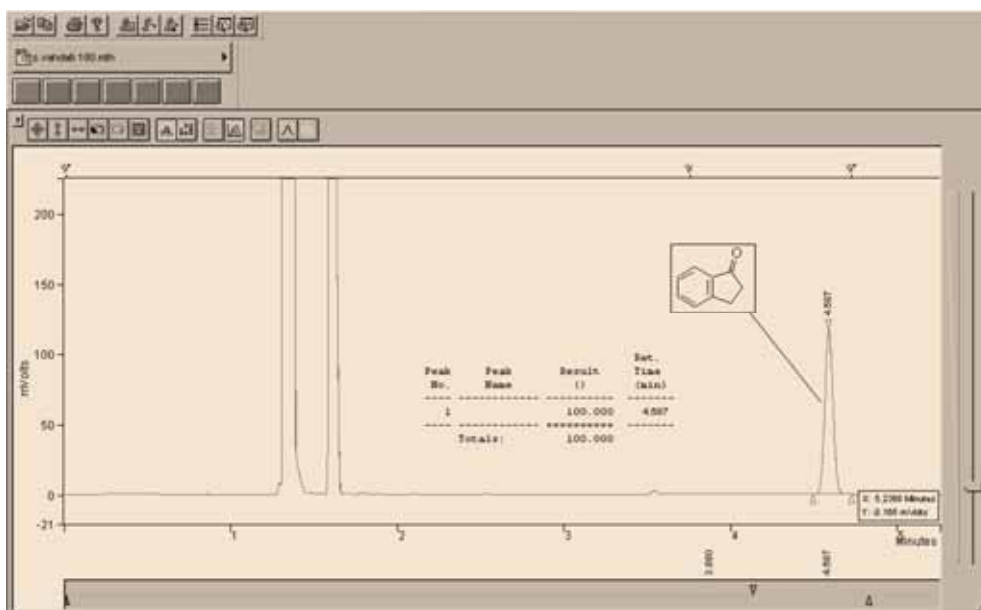

### Blank of 1-indanol

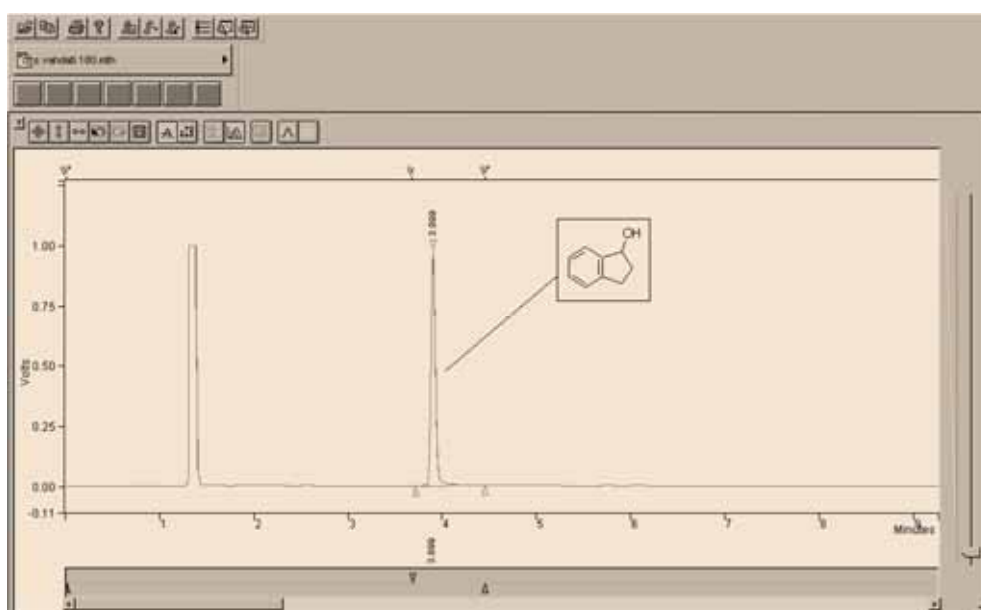

### 2-chlorobenzylalcohol

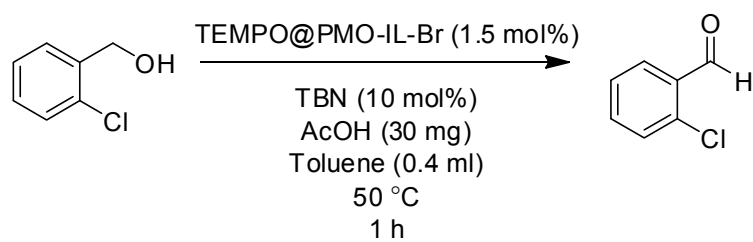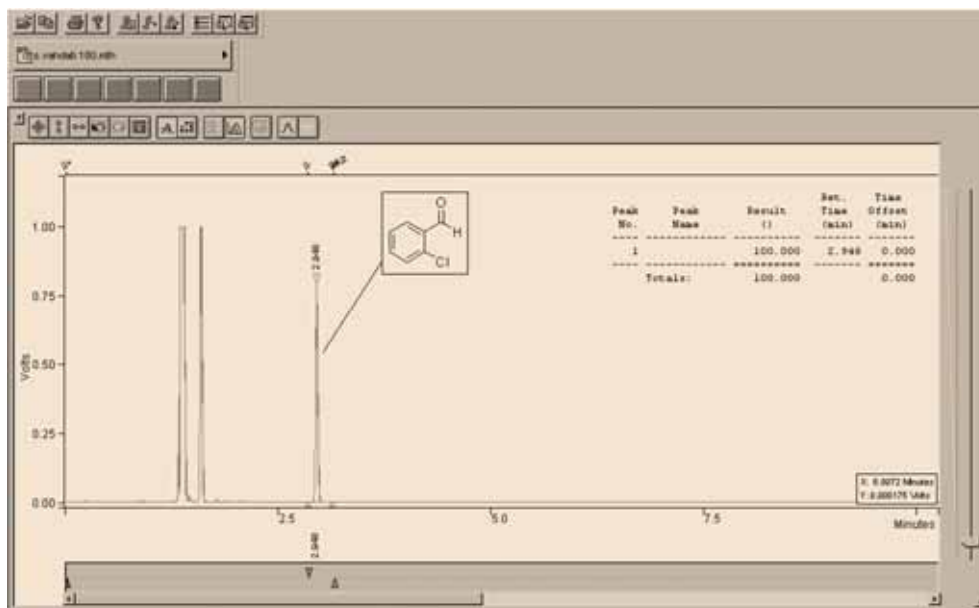

### Blank of 2-chlorobenzylalcohol

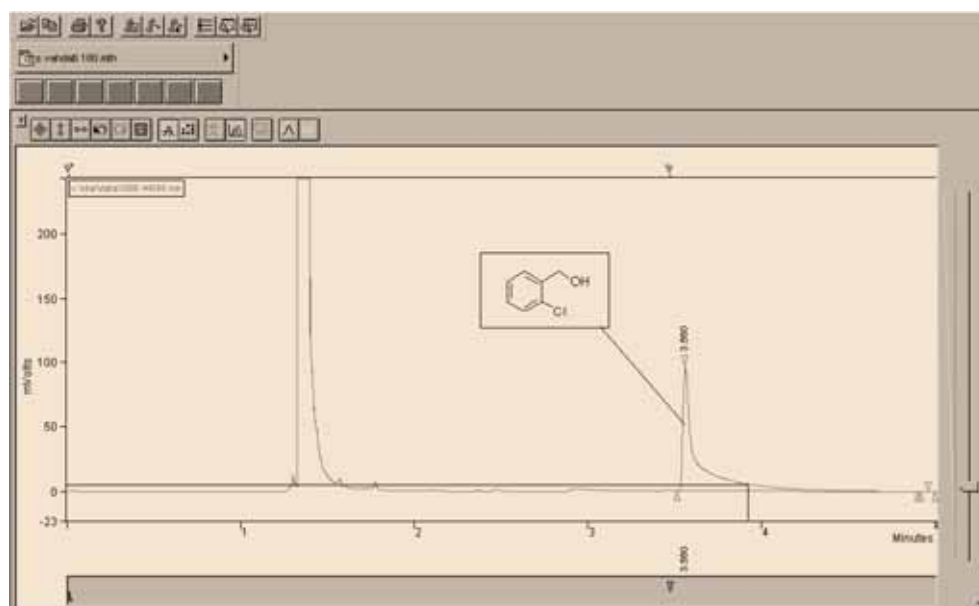

### 2-methylbenzylalcohol

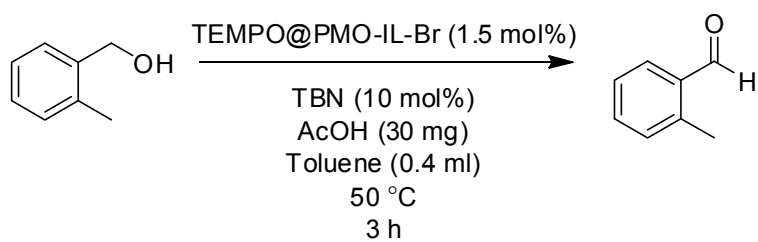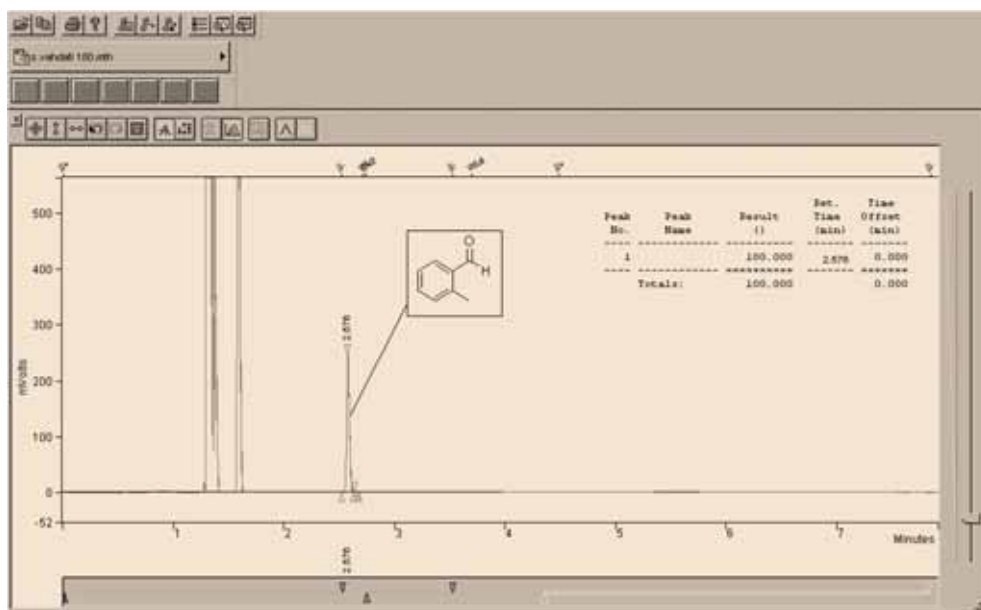

### Blank of 2-methylbenzylalcohol

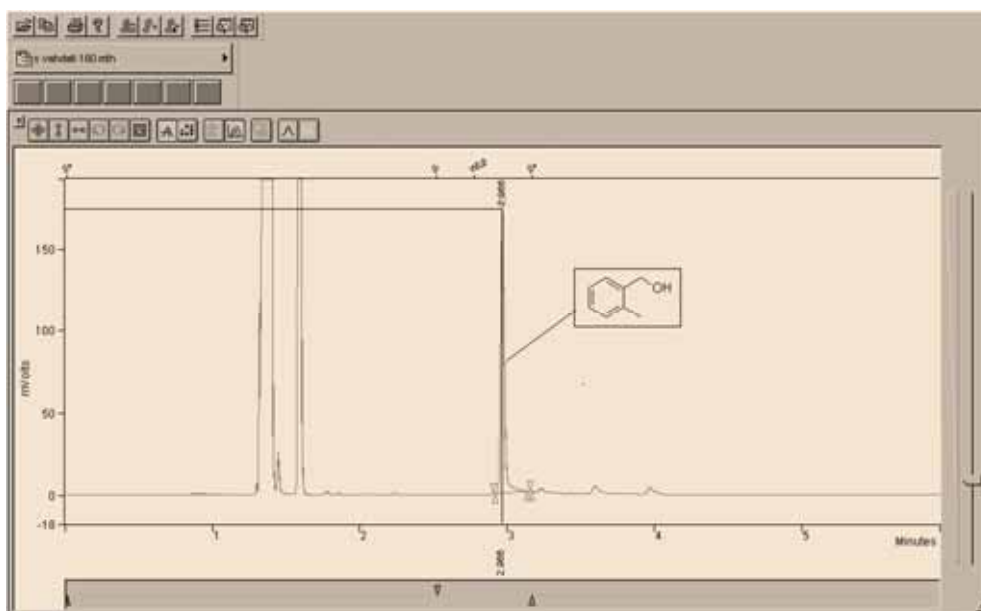

### 4-methylbenzylalcohol

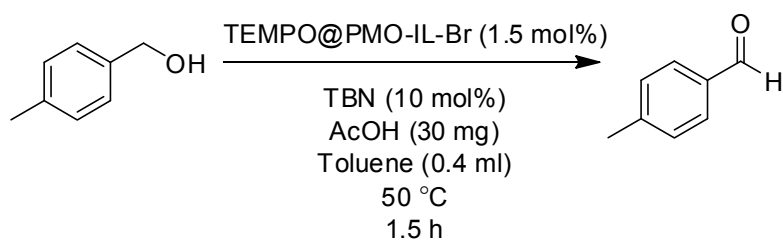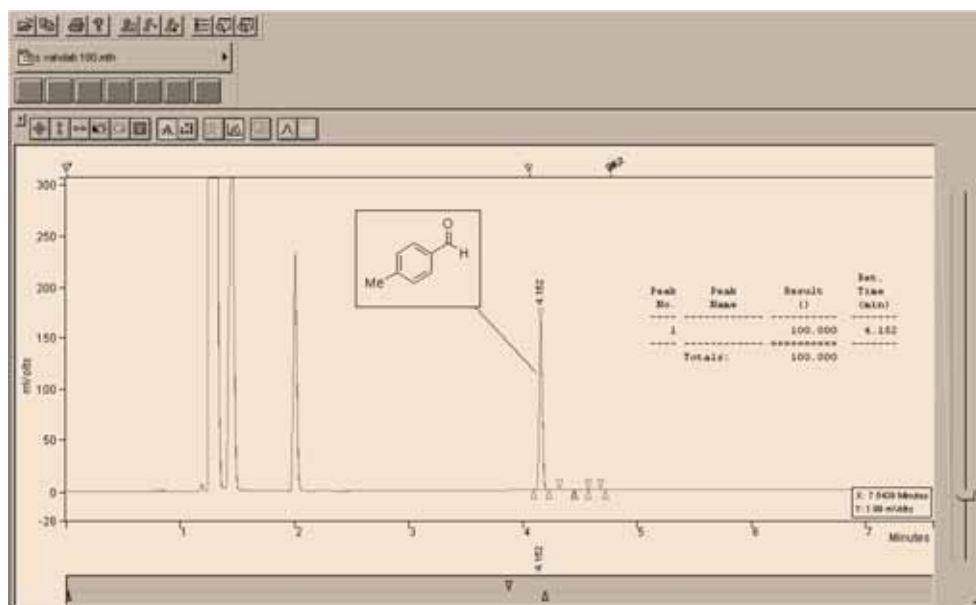

### Blank of 4-methylbenzylalcohol

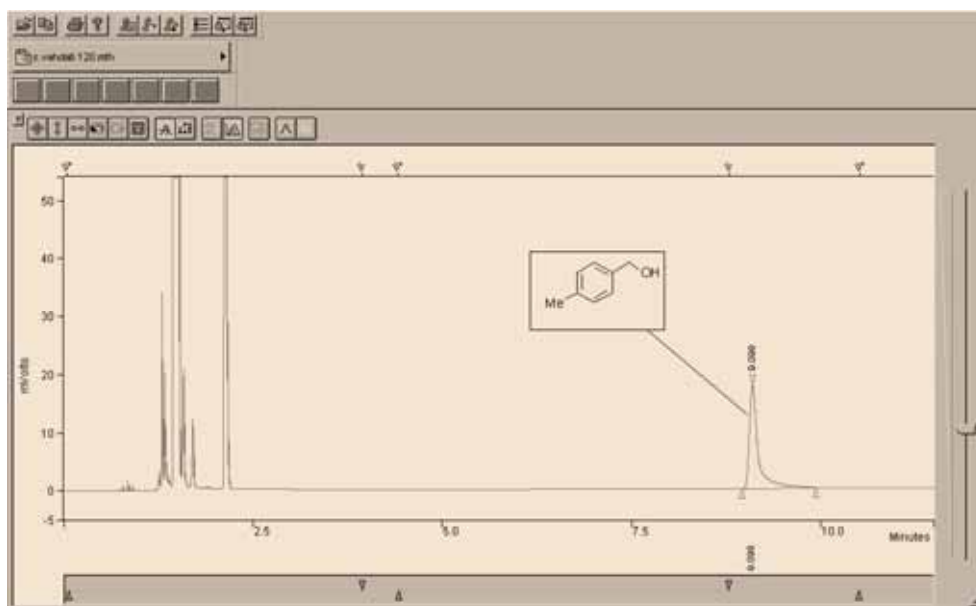

### 3-pyridylmethanol

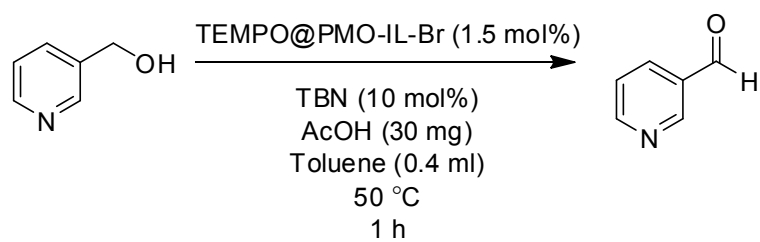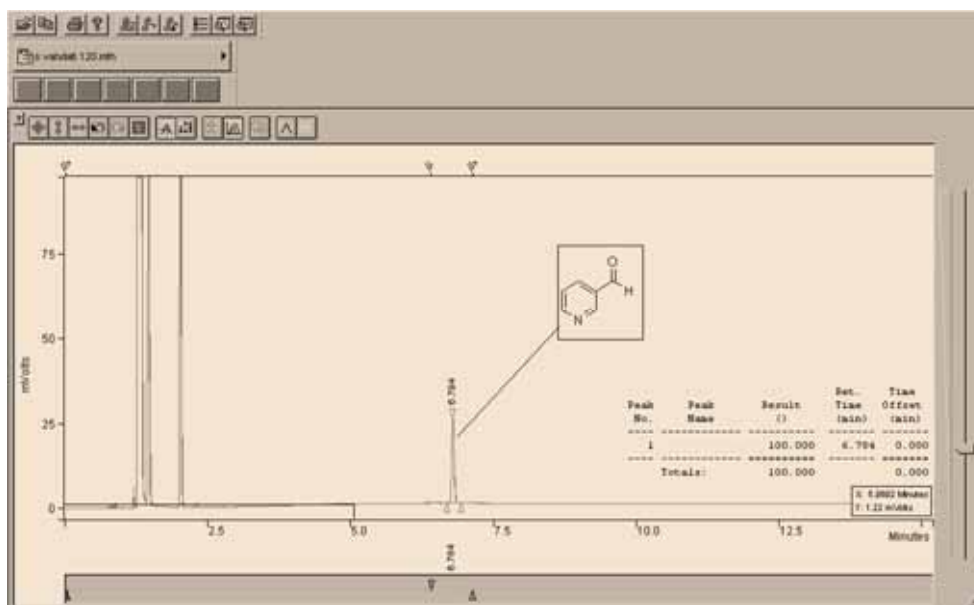

### Blank of 3-pyridylmethanol

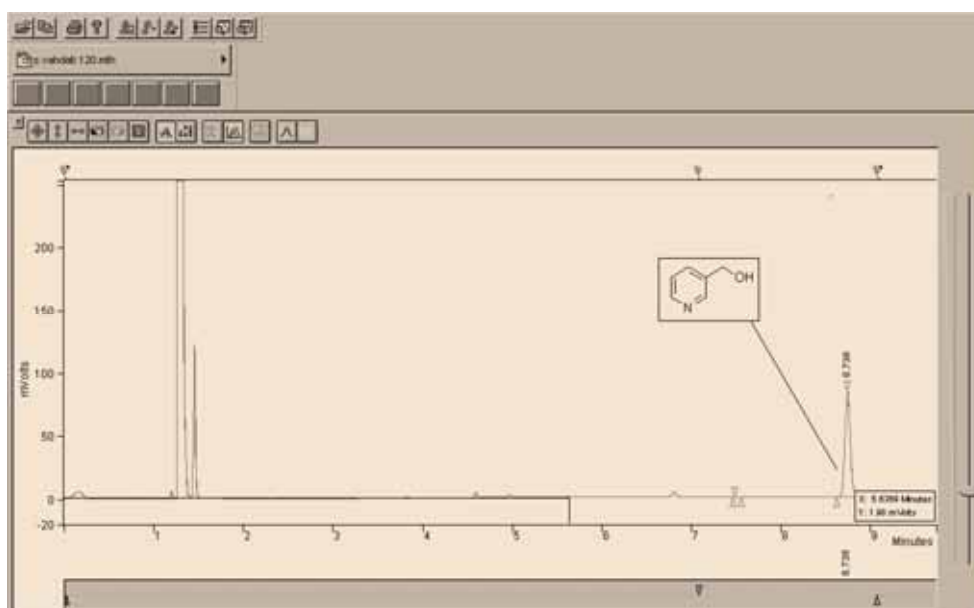

### 2-octanol

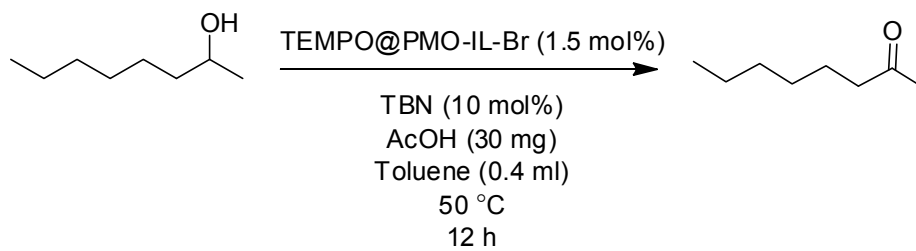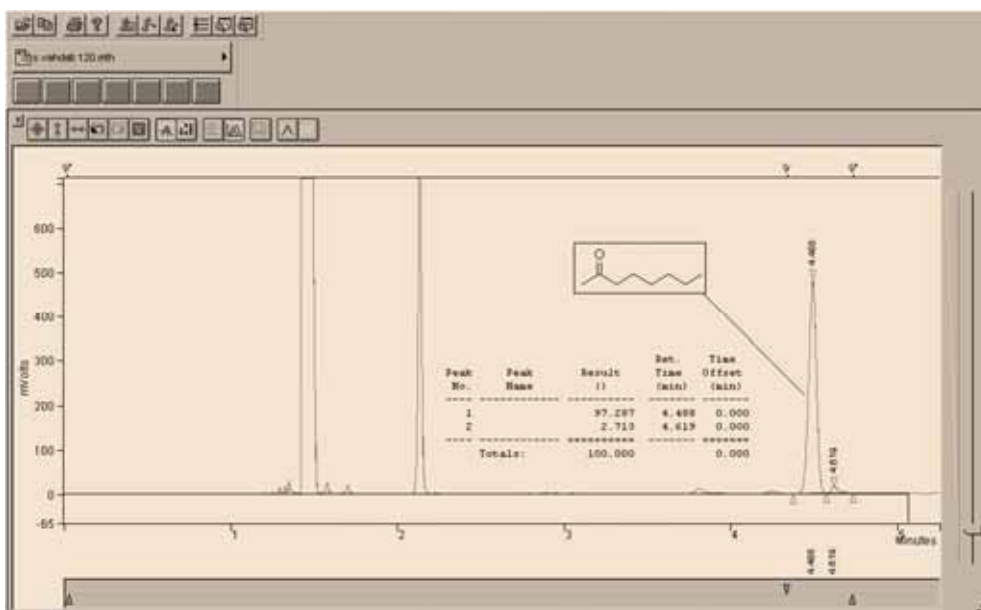

### Blank of 2-octanol

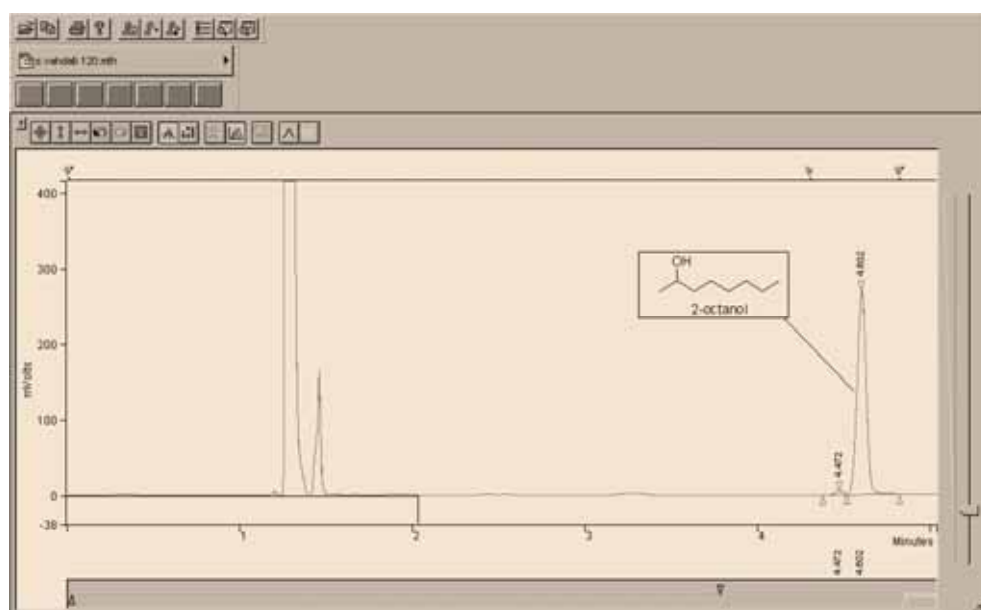

### Thiophenyl-2-methanol

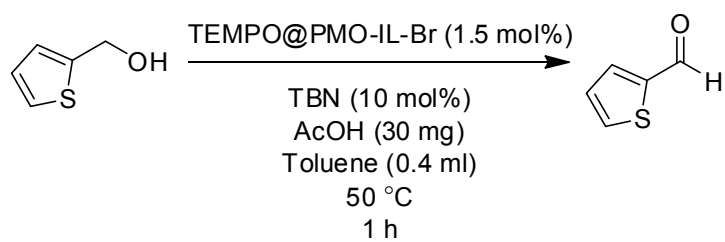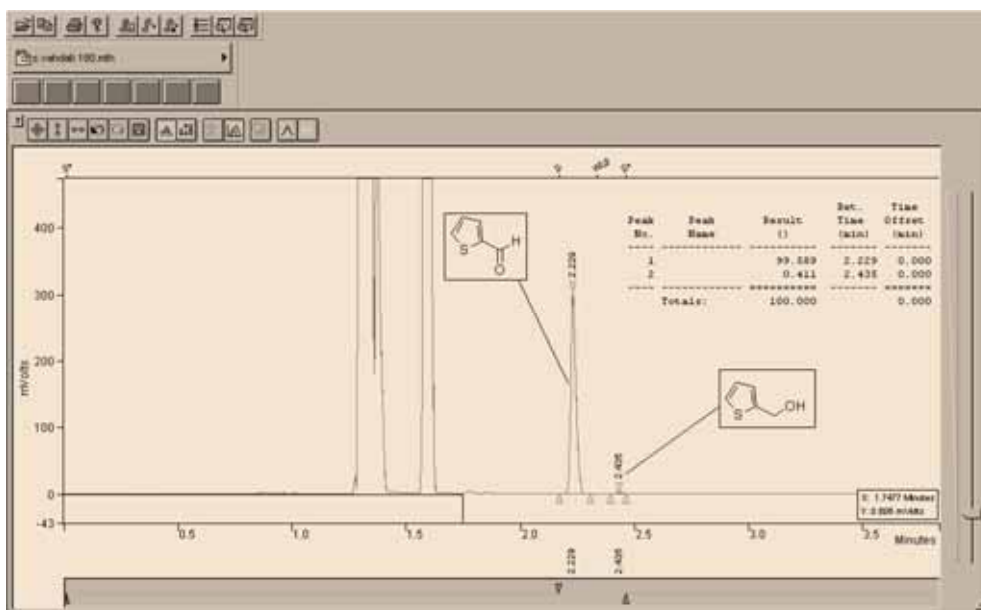

### Blank of thiophenyl-2-methanol

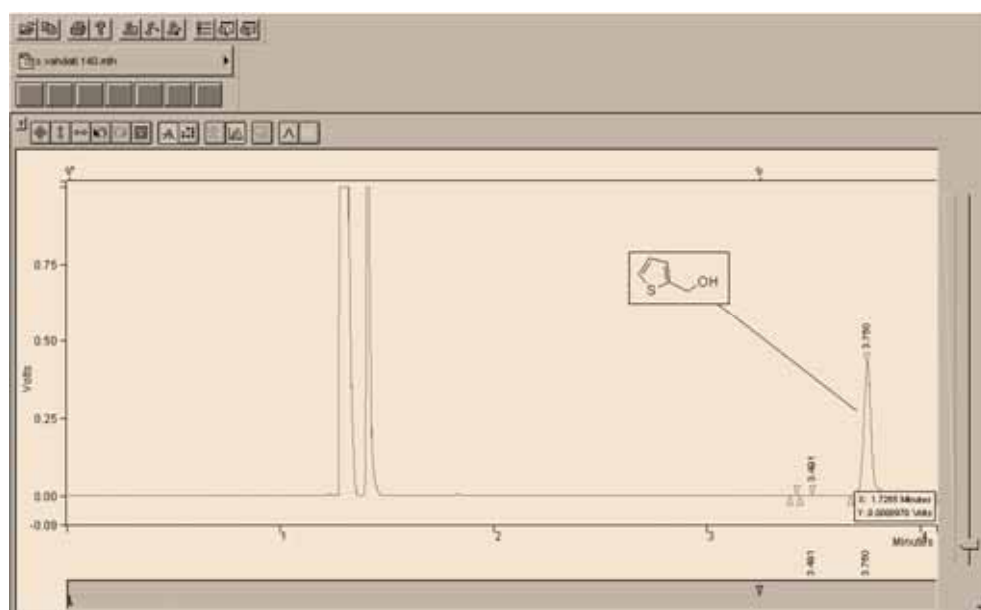

*3-chlorobenzylalcohol*

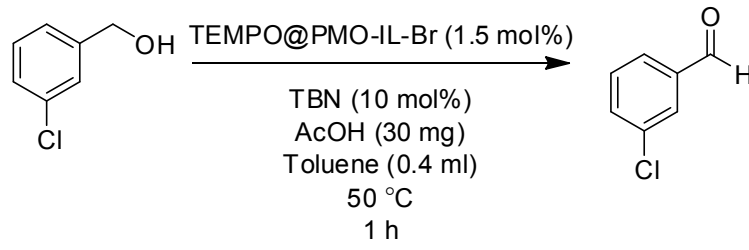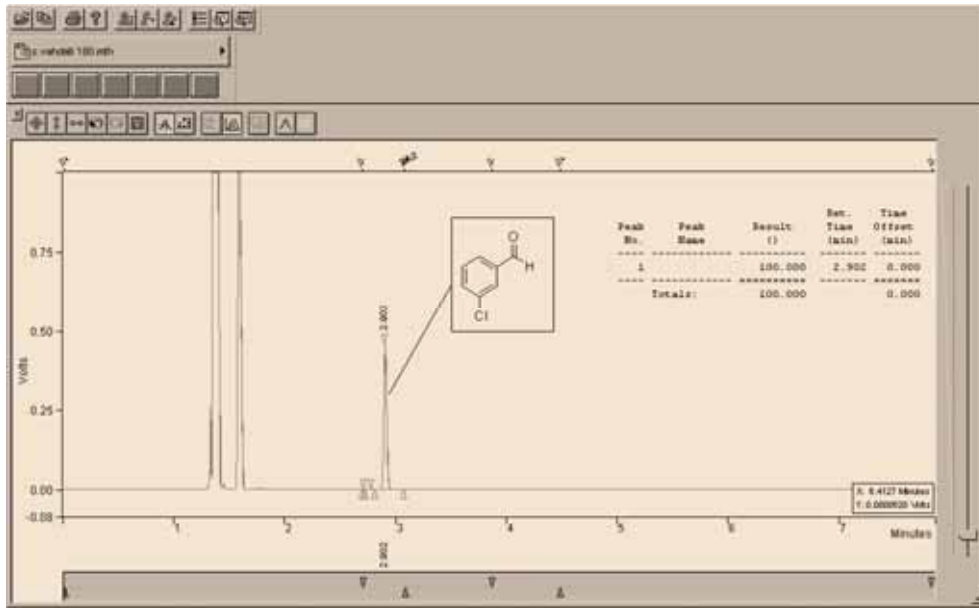

*Blank of 3-chlorobenzylalcohol*

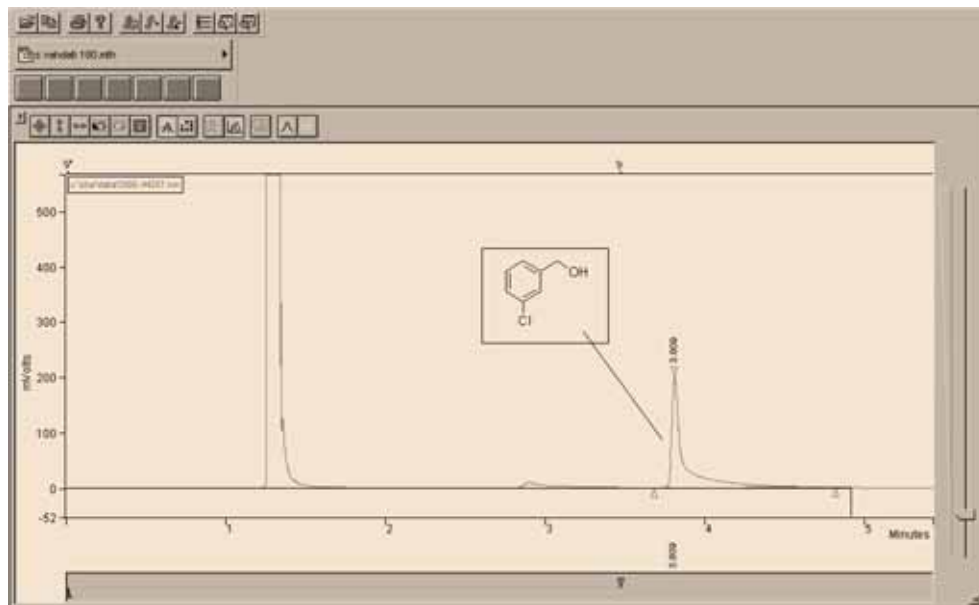



### 3-Nitrobenzylalcohol

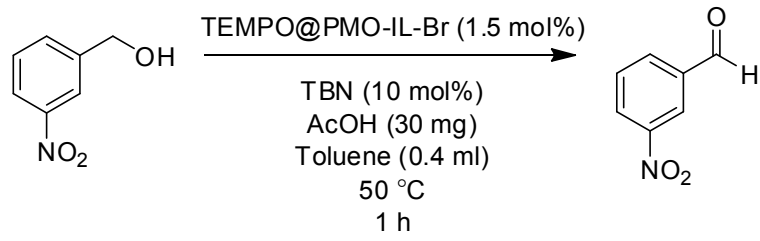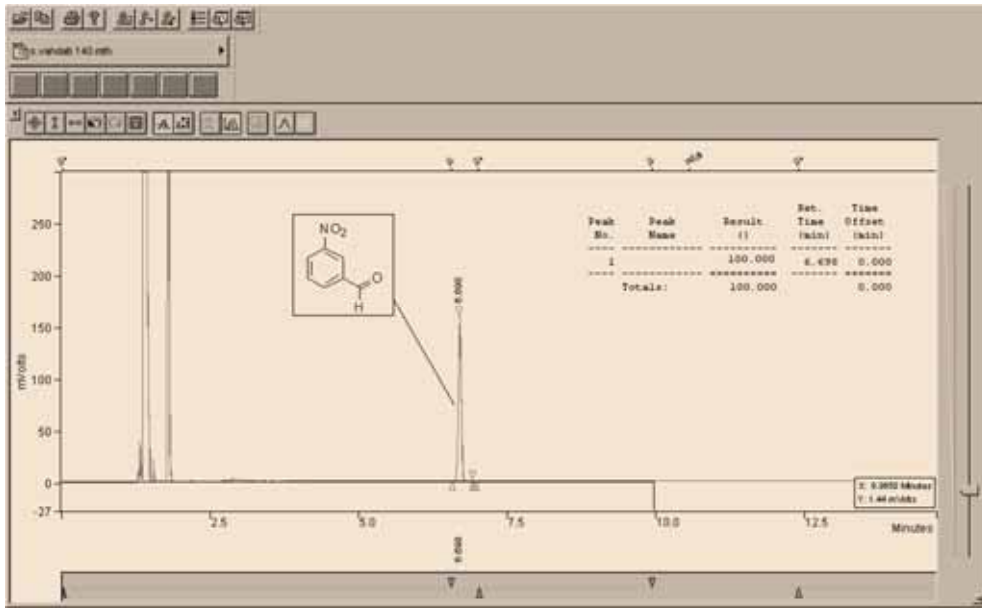

### Blank of 3-Nitrobenzylalcohol

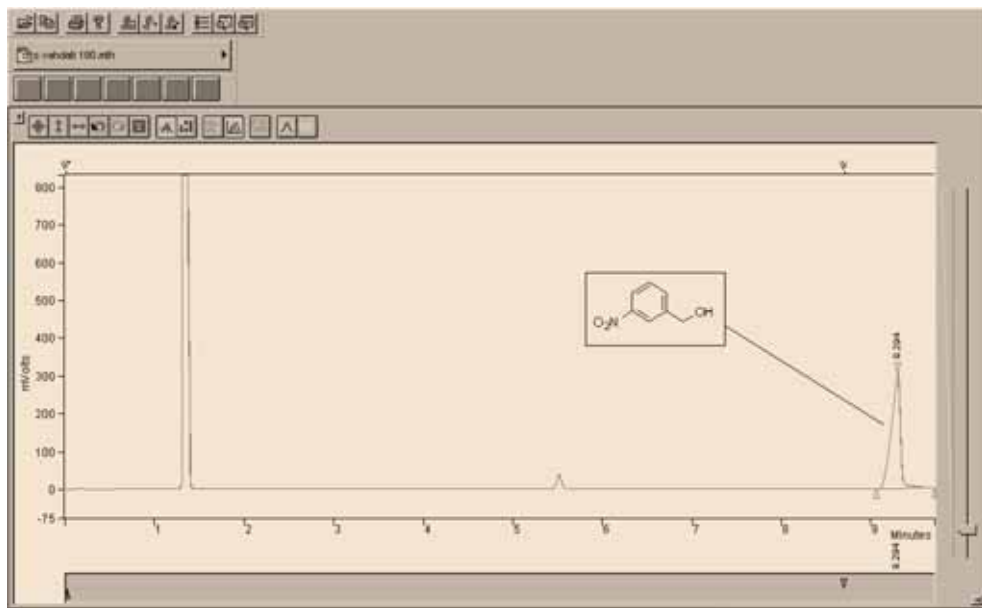

### 3-phenyl-1-propanol

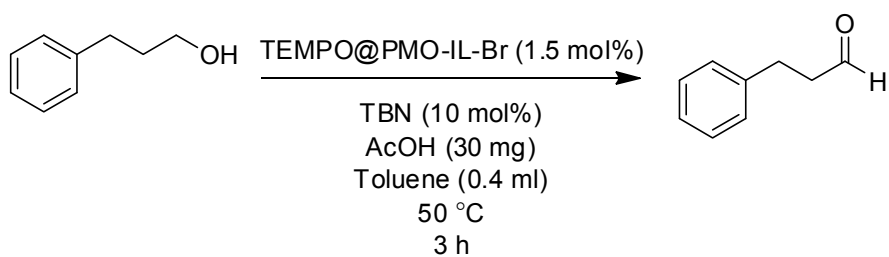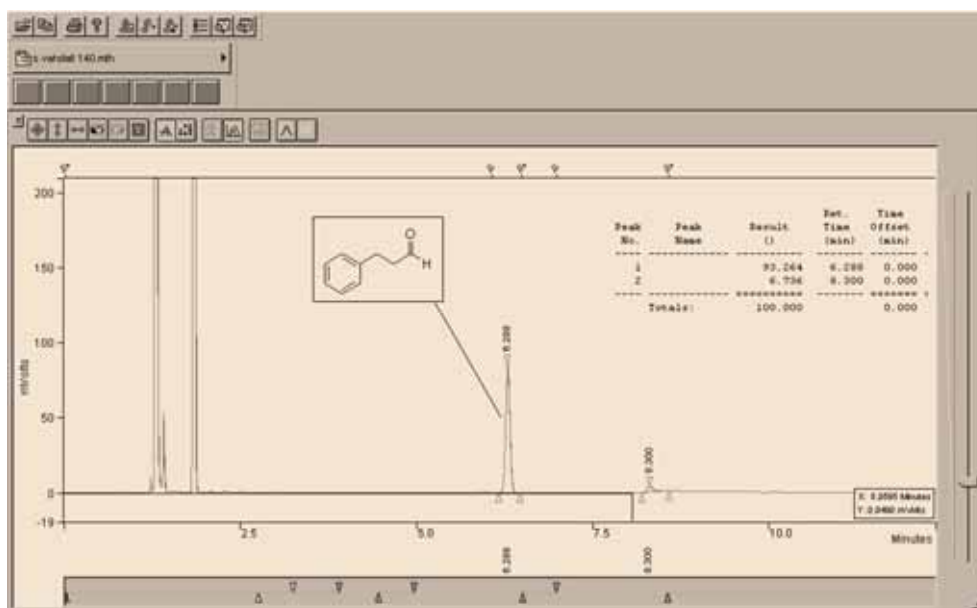

### Blank of 3-phenyl-1-propanol

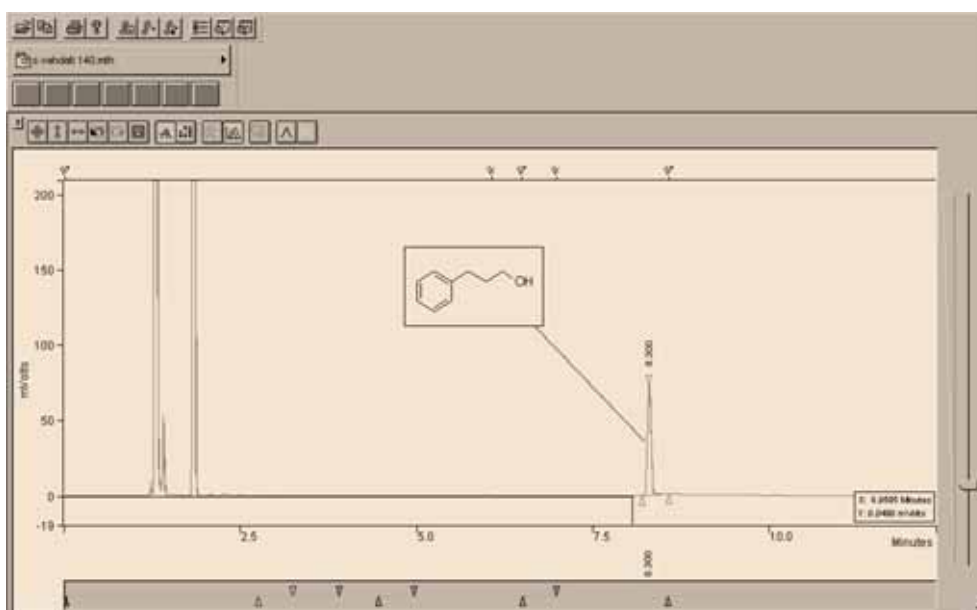

### 4-thiomethylbenzylalcohol

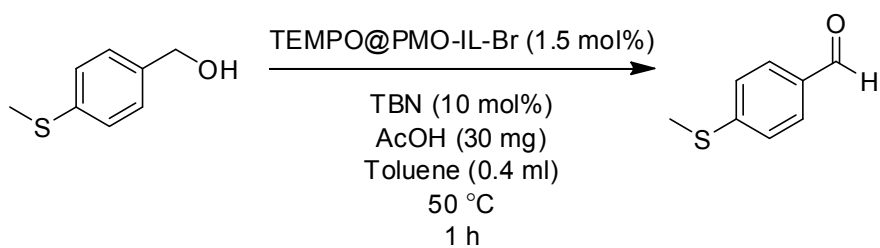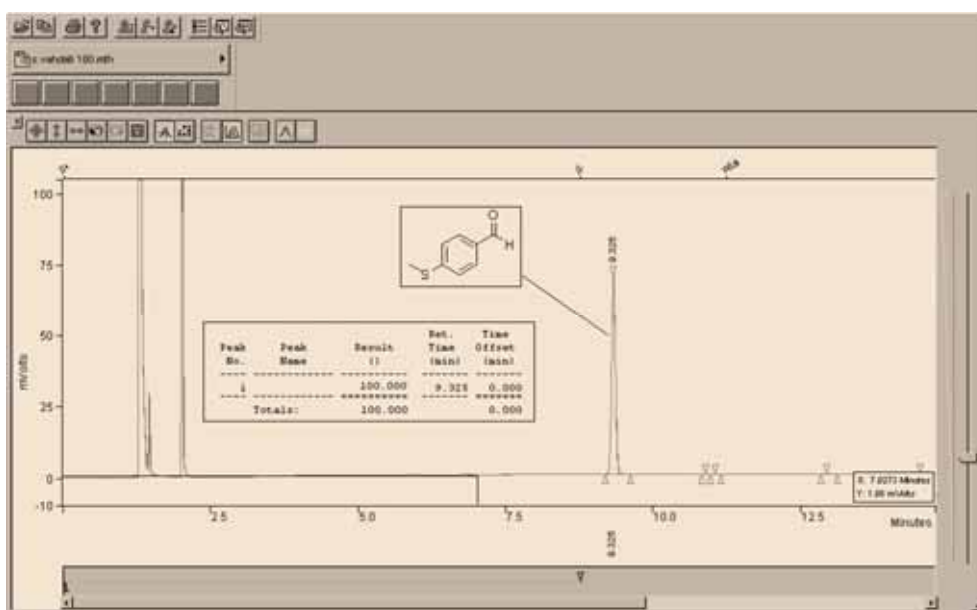

### Blank of 4-thiomethylbenzylalcohol

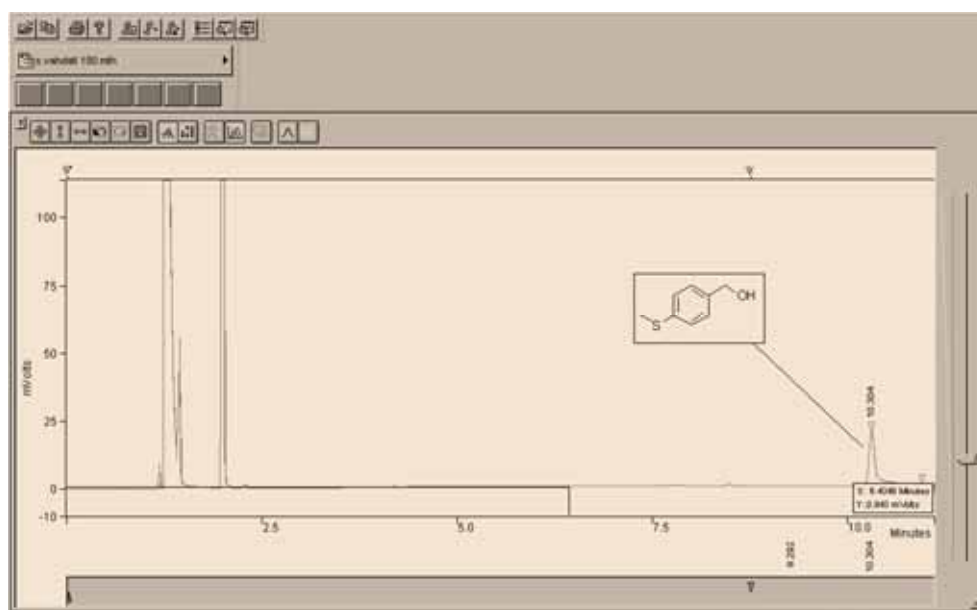

4-nitrobenzylalcohol

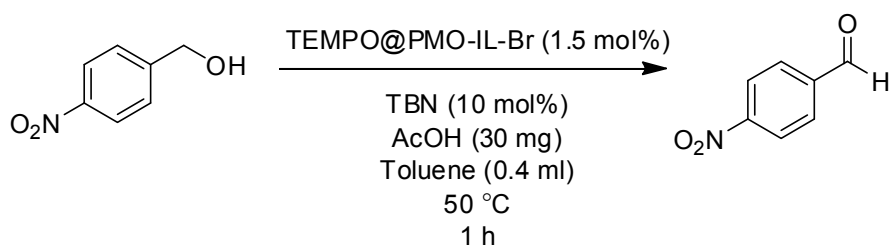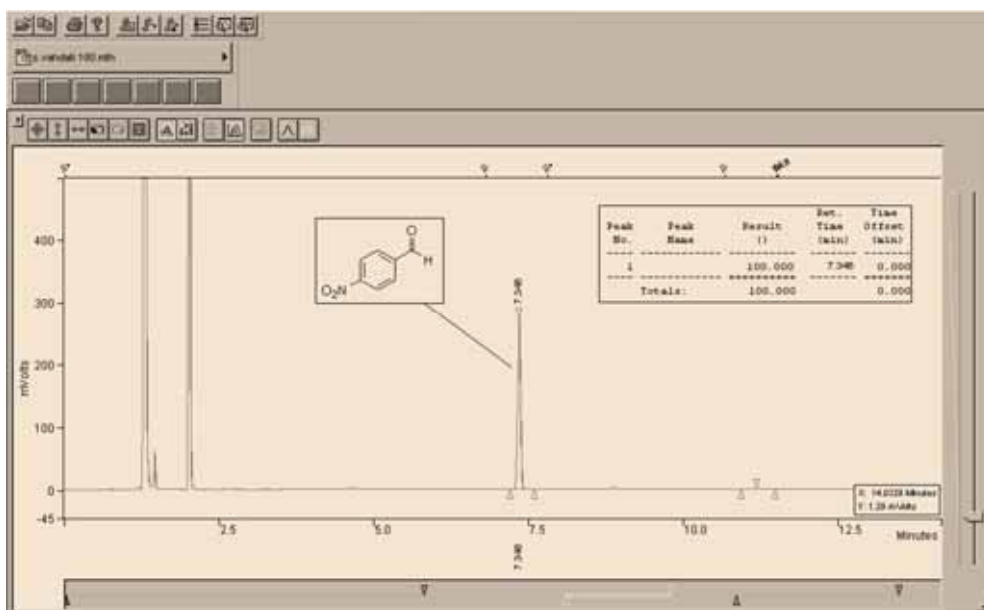

Blank of 4-nitrobenzylalcohol

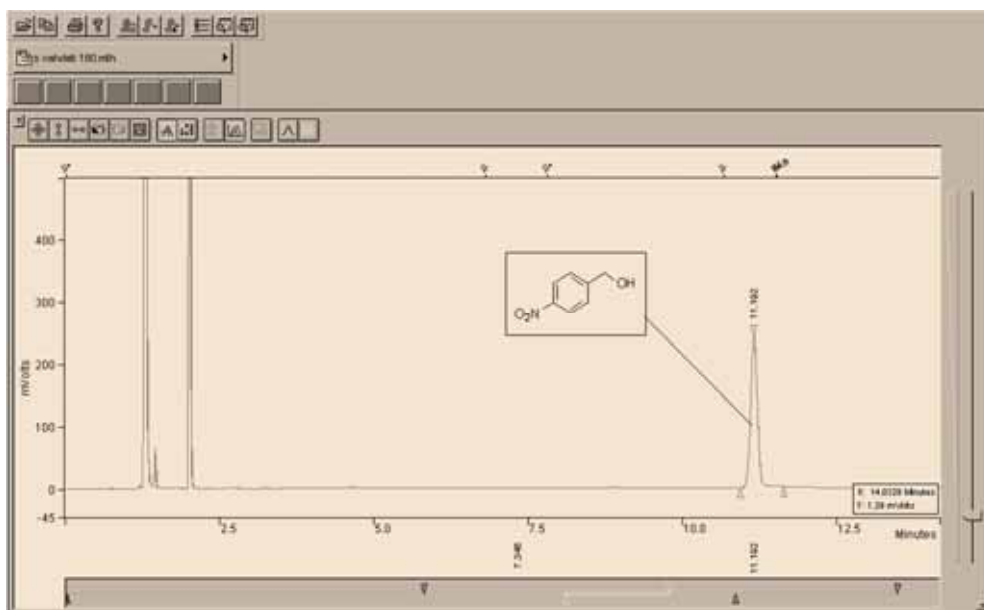

### 2-Norbornano

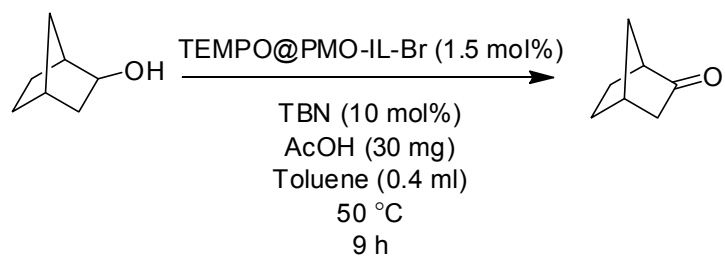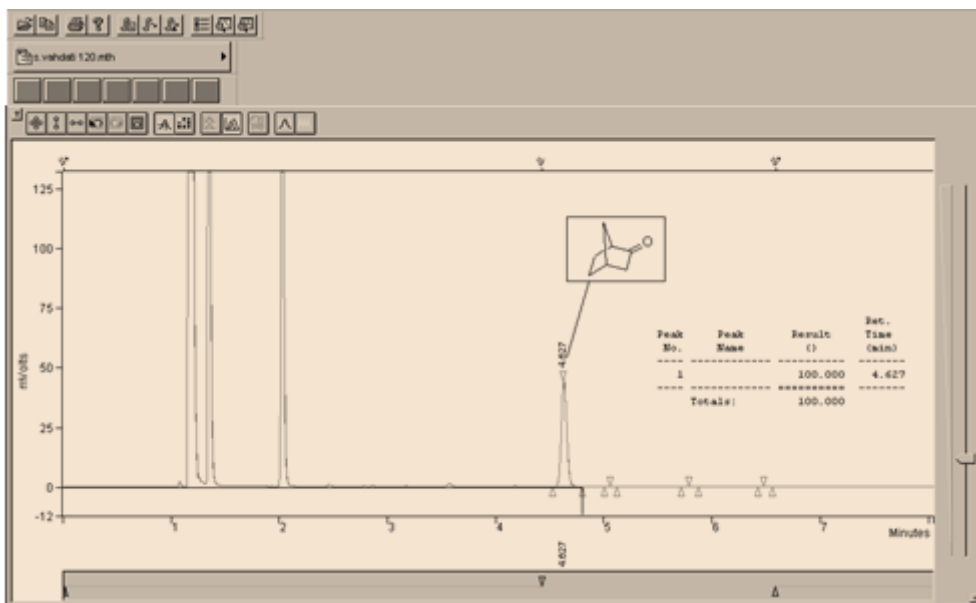

### Blank of 2-Norbornano

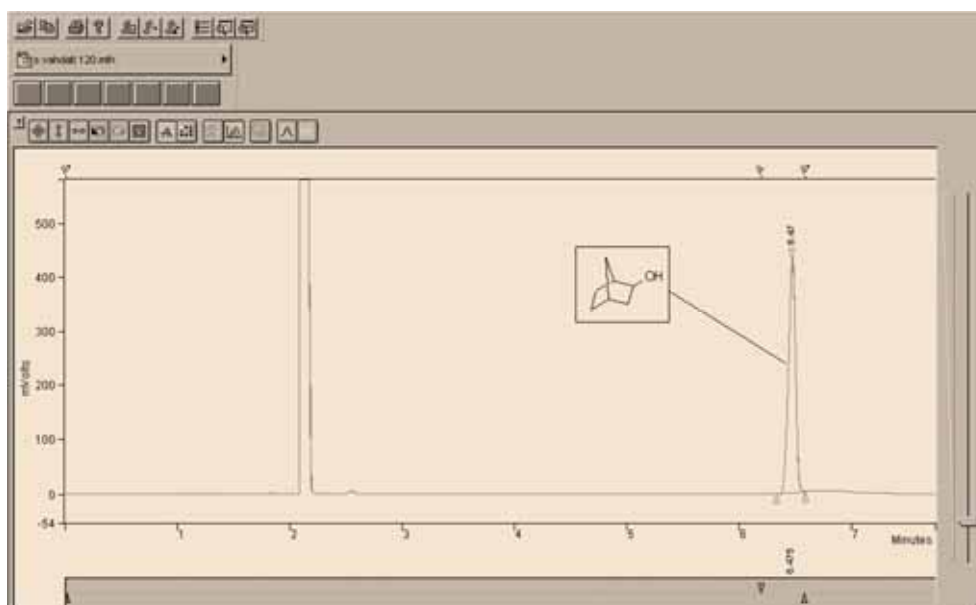

### 1-Tetralol

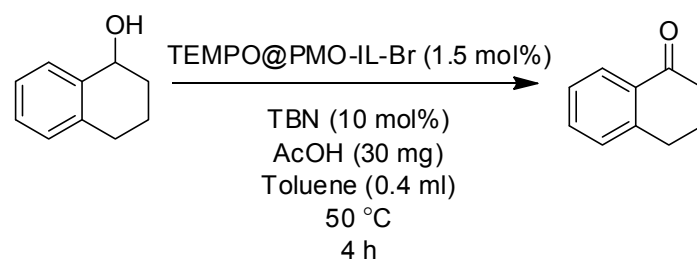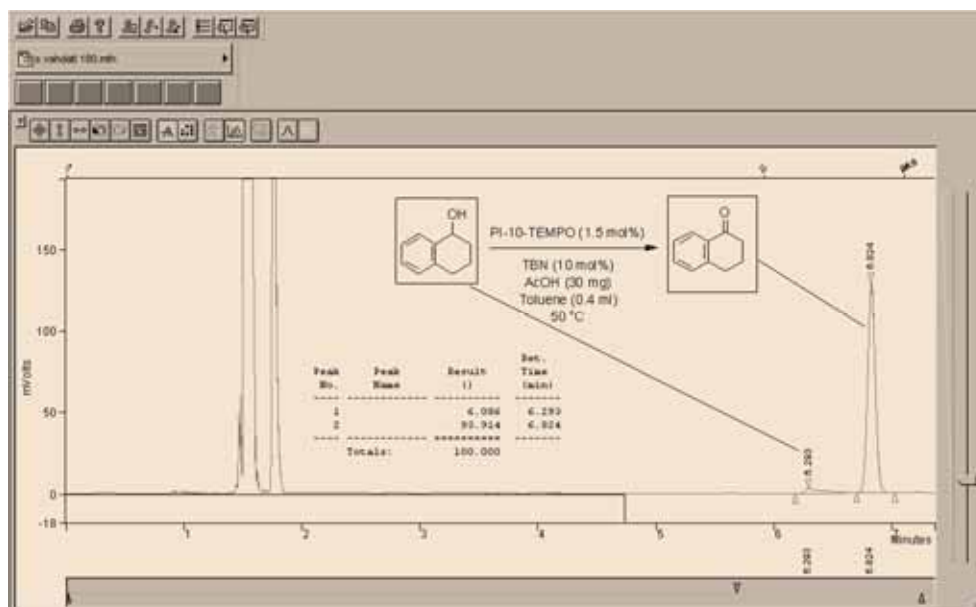

*Blank of 1-Tetralol*

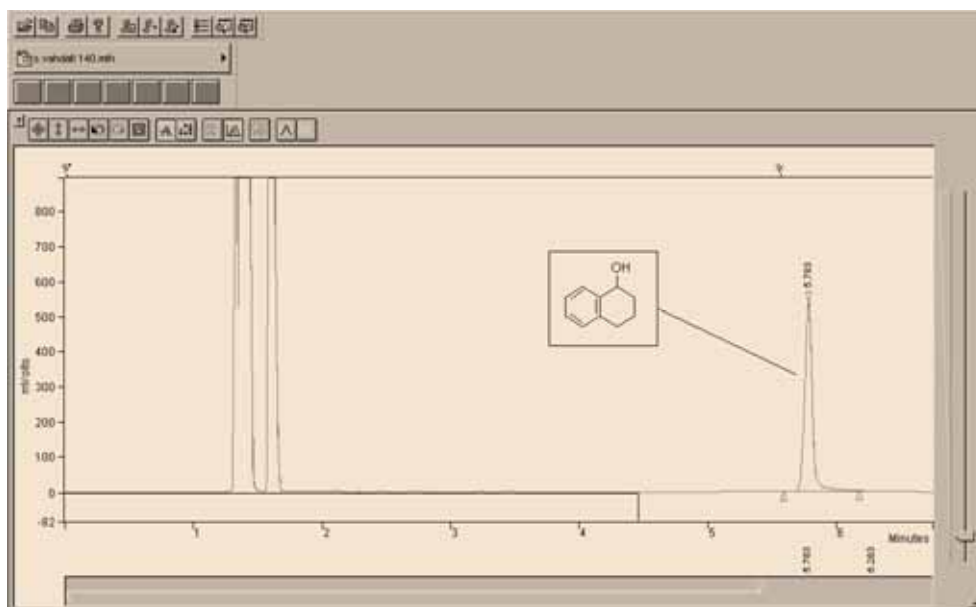

*1-Octanol*

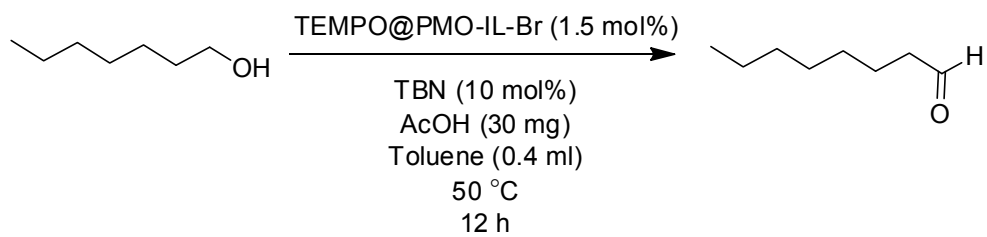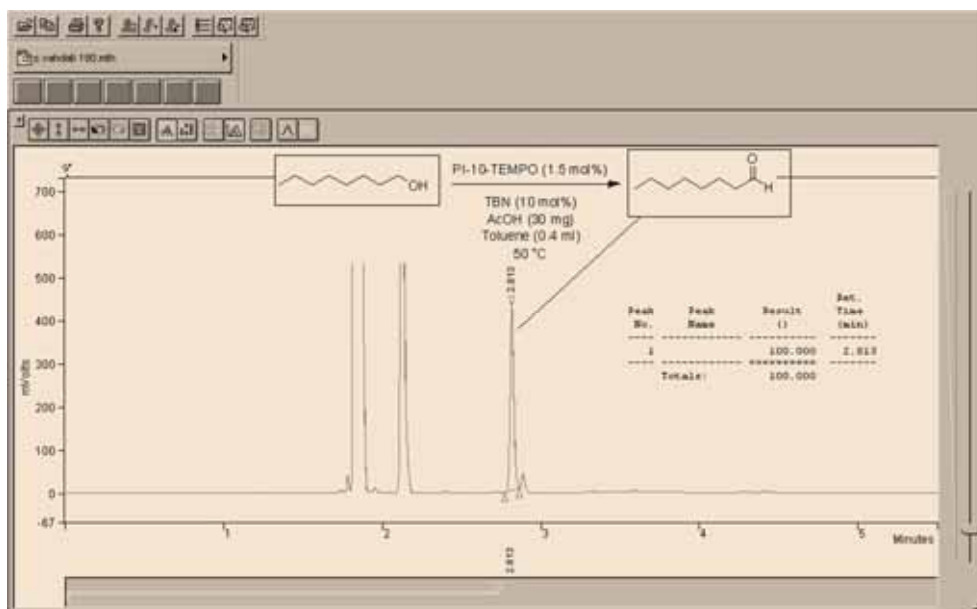

*Blank of 1-octanol*

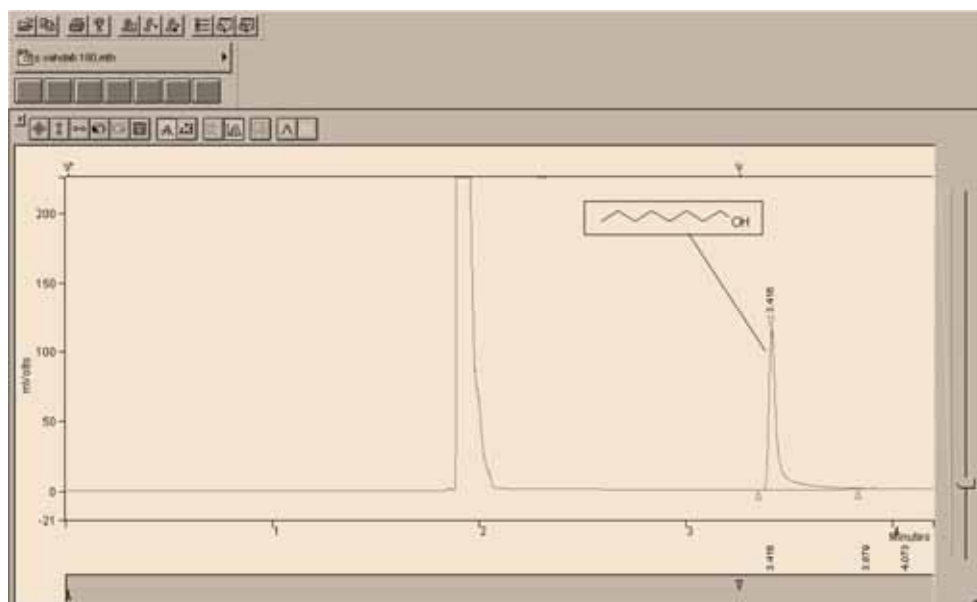

*Cinnamylalcohol*

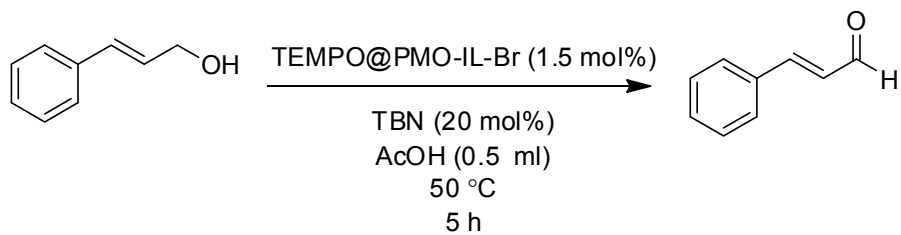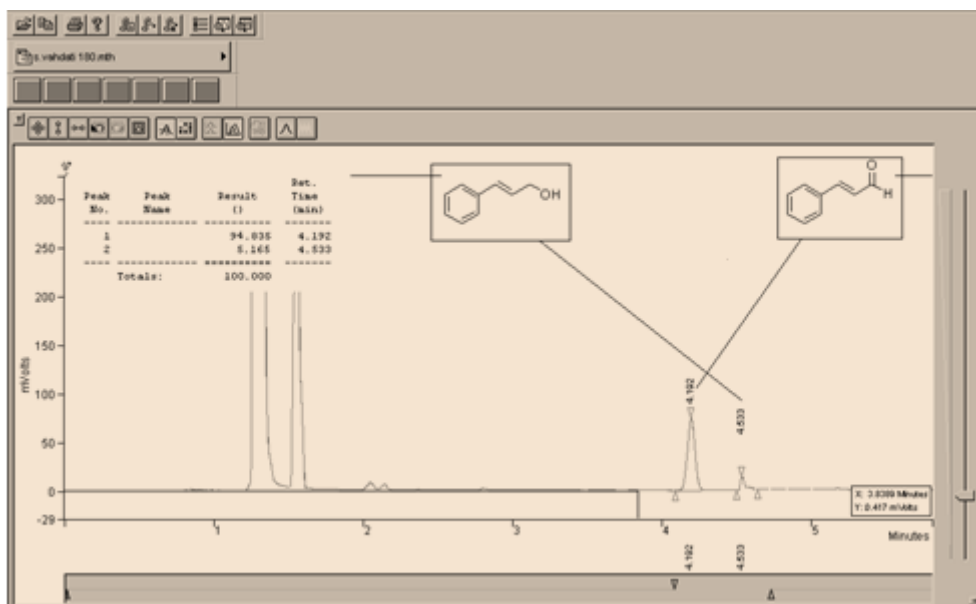

*Blank of cinnamylalcohol*

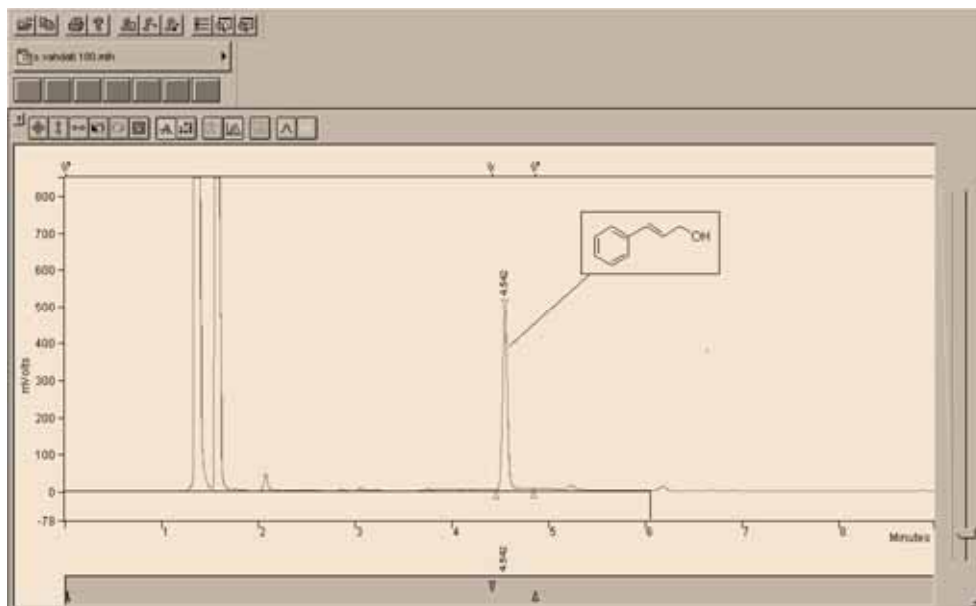



### 3-methylbenzylalcohol

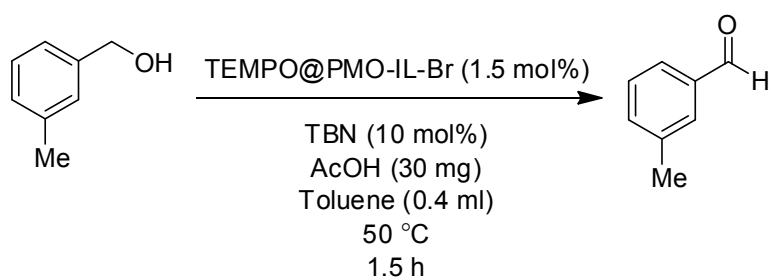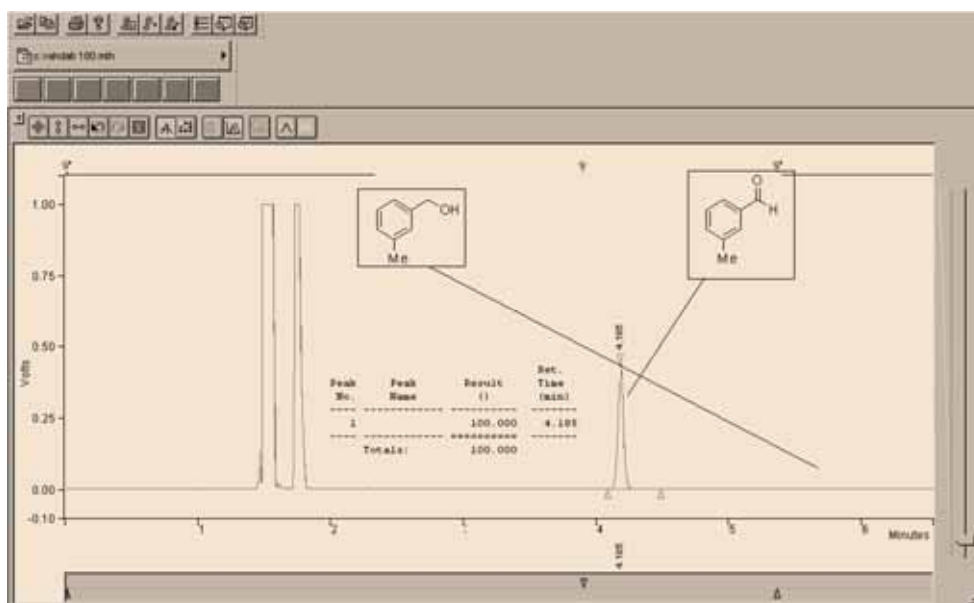

### Blank of 3-methylbenzylalcohol

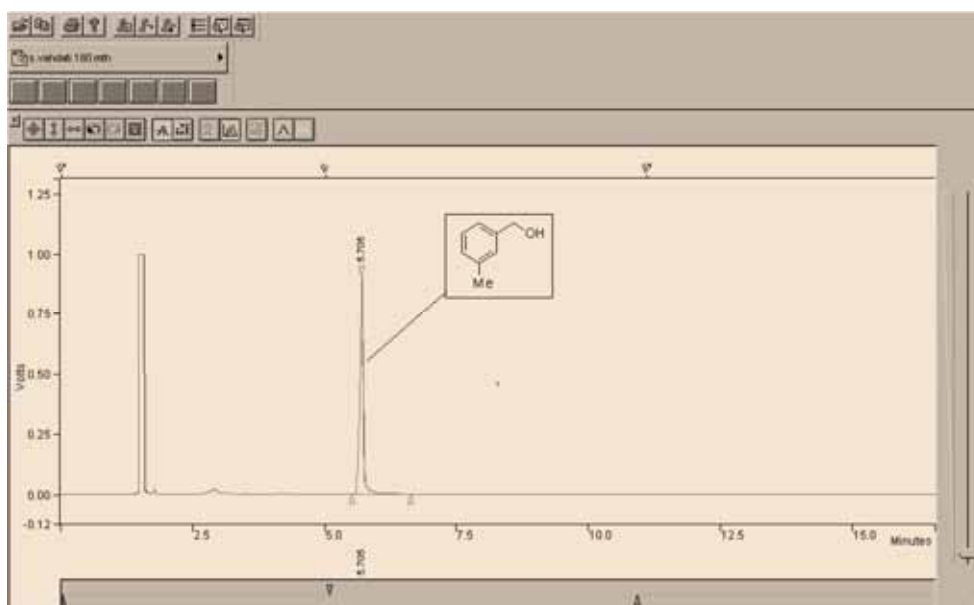

*1-([1,1'-biphenyl]-4-yl)ethanol*

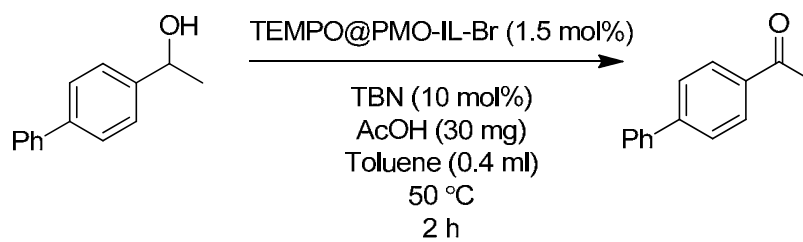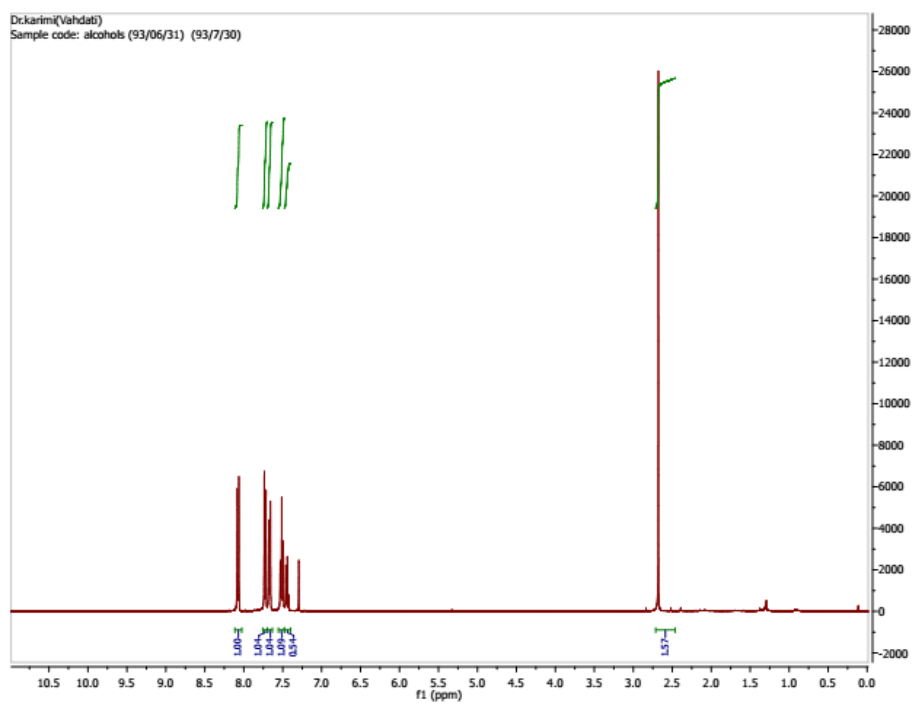

The <sup>1</sup>H NMR indicated oxidation of 1-([1,1'-biphenyl]-4-yl)ethanol was completed.

**(E)-1,3-Diphenylprop-2-en-1-ol**

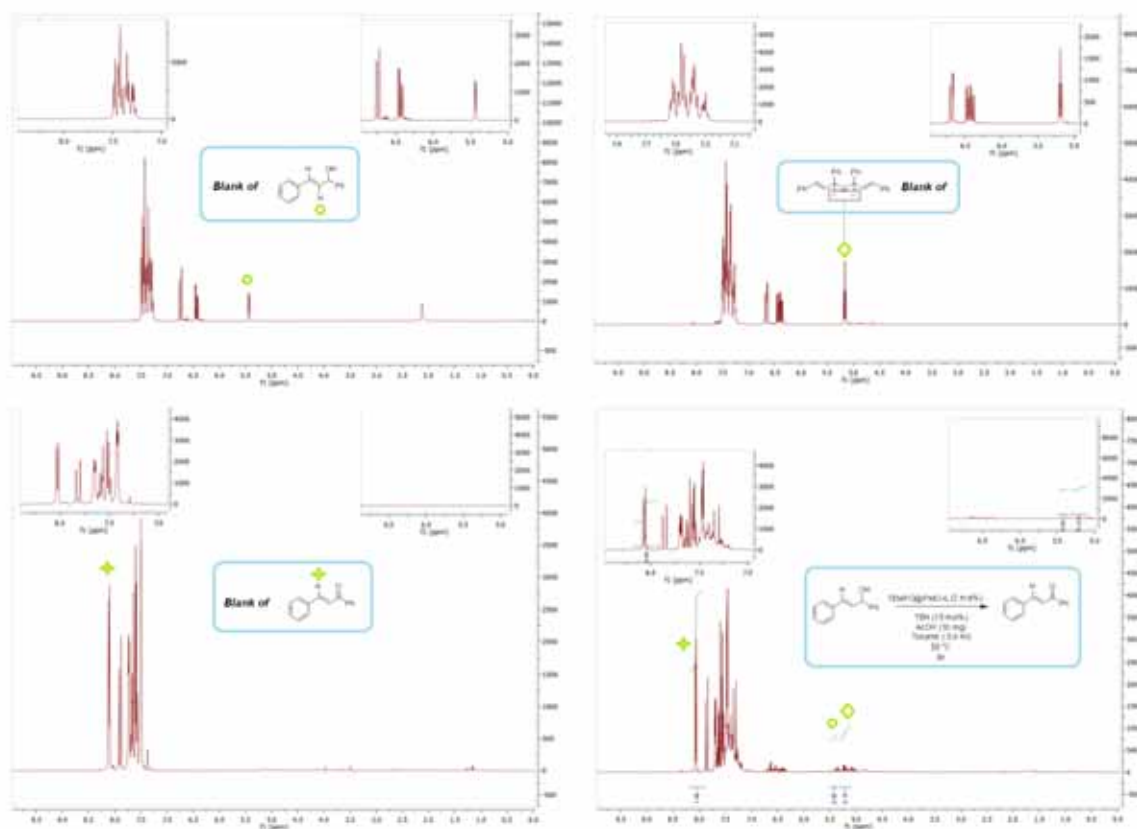

$$\text{Yield} = (f_{\text{Ketone}}) / (f_{\text{Alcohol}} + f_{\text{Ketone}} + f_{\text{Ether}}) = (1) / (0.06 + 1 + 0.08) = 87\%$$

*(E)*-3-(2,4-dichlorophenyl)-1-phenylprop-2-en-1-ol

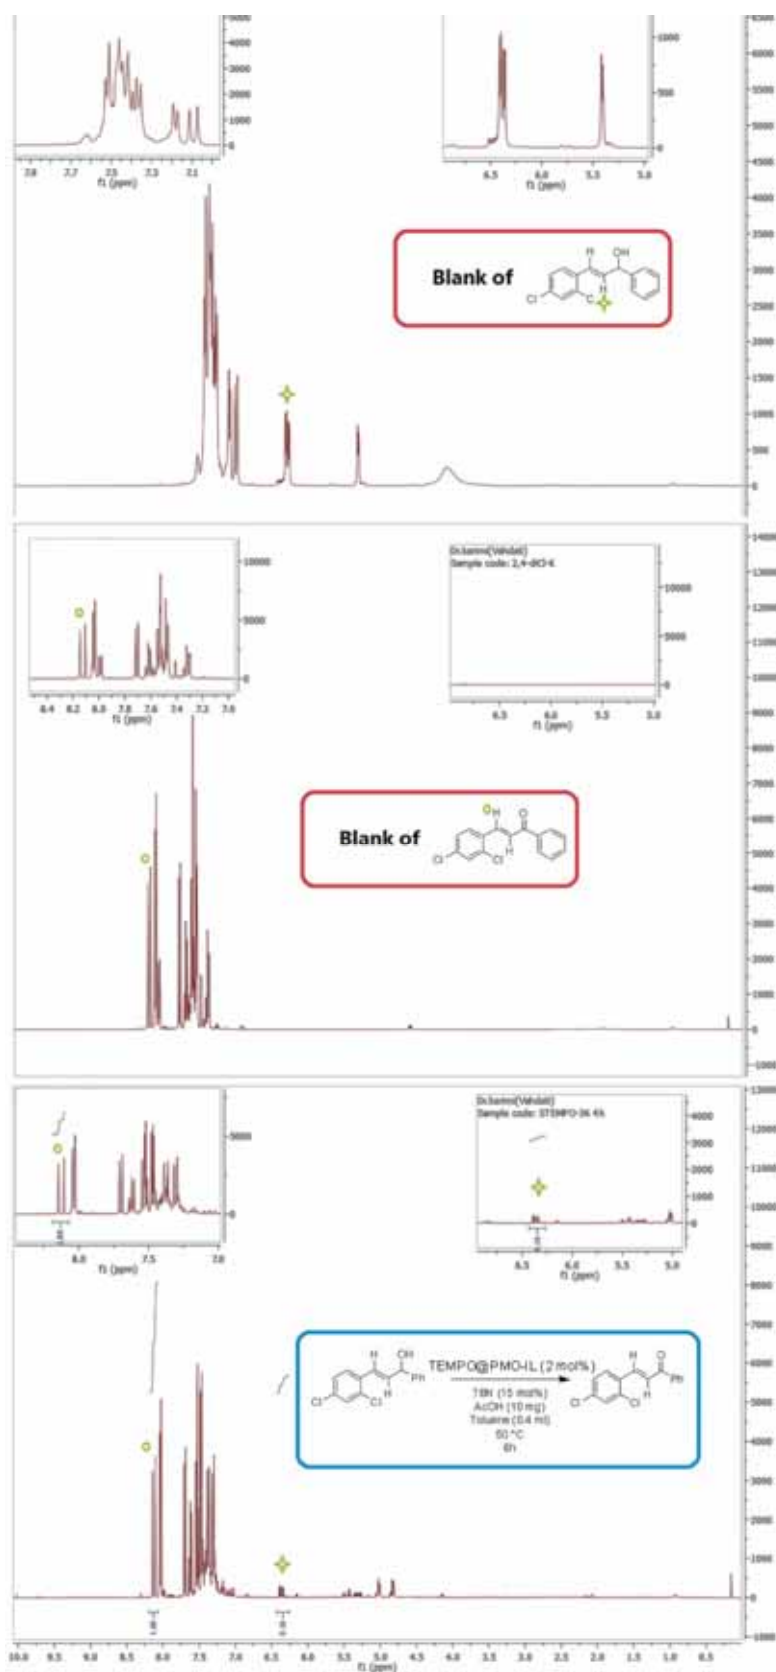

$$\text{Yield} = (fH_{\text{ketone}}) / (fH_{\text{alcohol}} + fH_{\text{ketone}} + fH_{\text{ether}}) = (1) / (1 + .16 + 0) = 86\%$$

*(E)*-3-(4-nitrophenyl)-1-phenylprop-2-en-1-ol

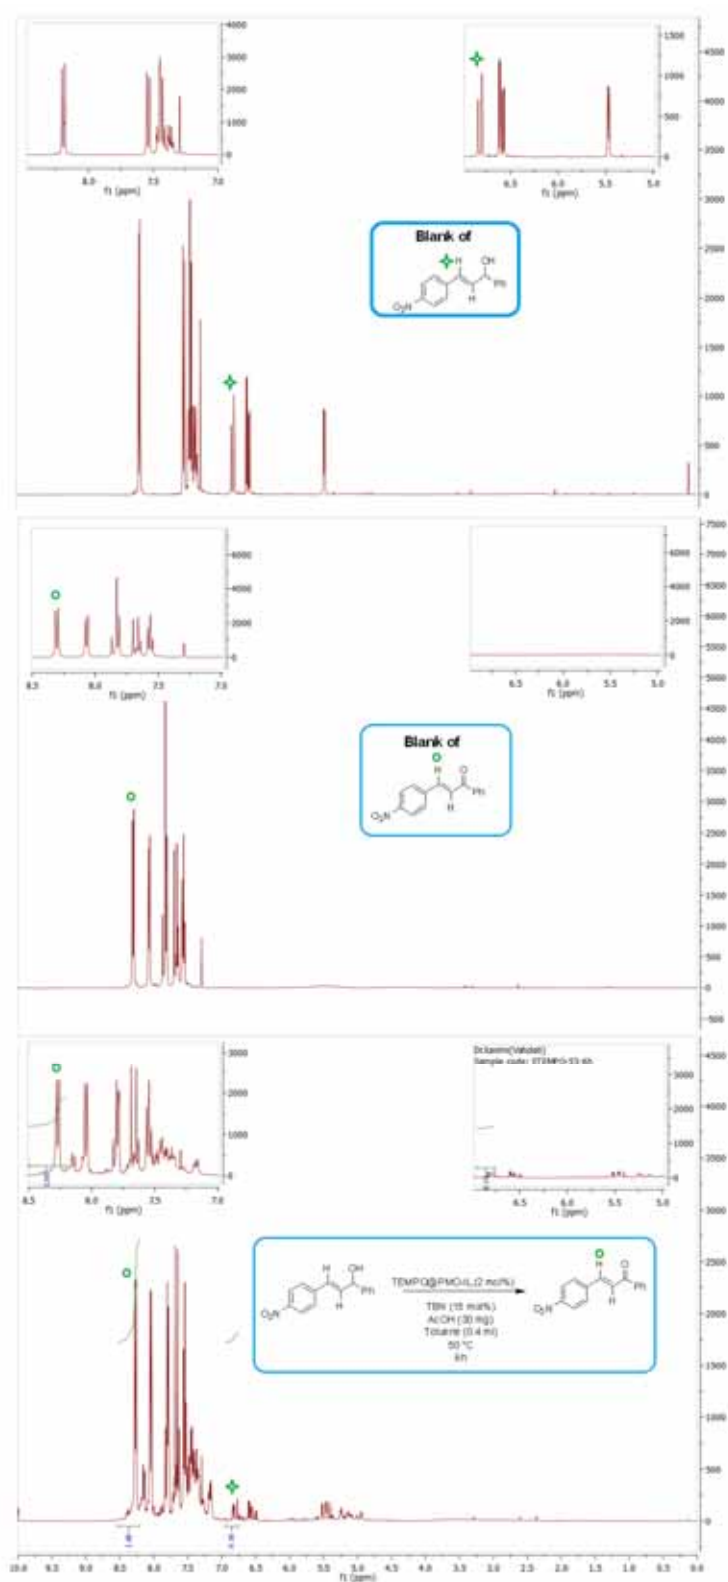

$$Yield = (fH_{ketone}) / (fH_{alcohol} + fH_{ketone} + fH_{ether}) = (1) / (1 + 0.1 + 0) = 90$$

*(E)*-3-(4-methylphenyl)-1-phenylprop-2-en-1-ol

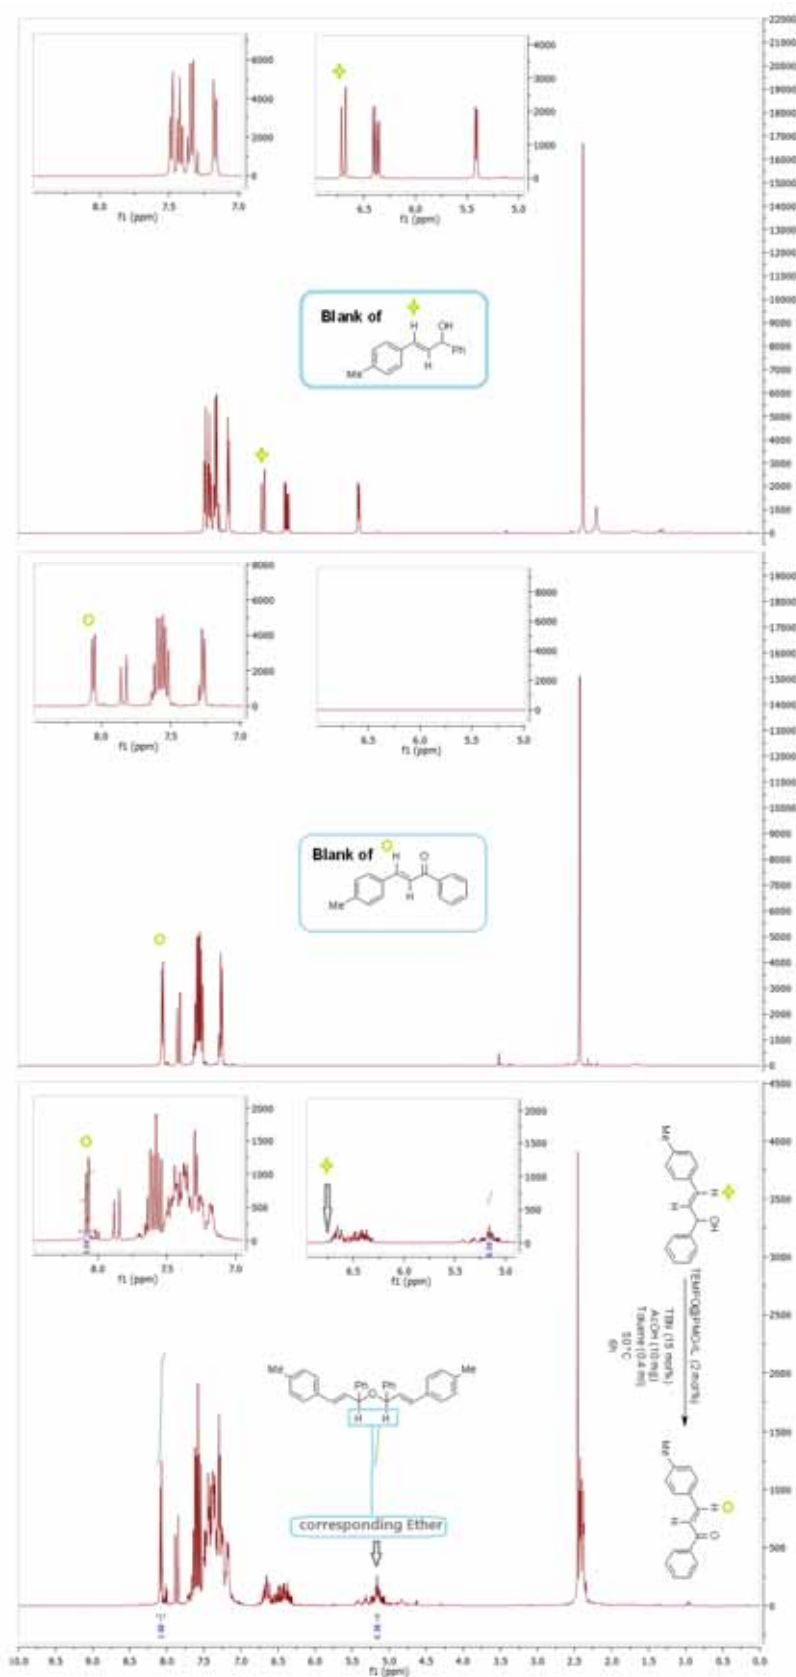

$$\text{Yield} = (fH_{\text{ketone}}) / (fH_{\text{alcohol}} + fH_{\text{ketone}} + fH_{\text{ether}}) = (1) / (1 + 0 + 0.19) = 84\%$$

*(E)*-3-(3-methoxyphenyl)-1-phenylprop-2-en-1-ol

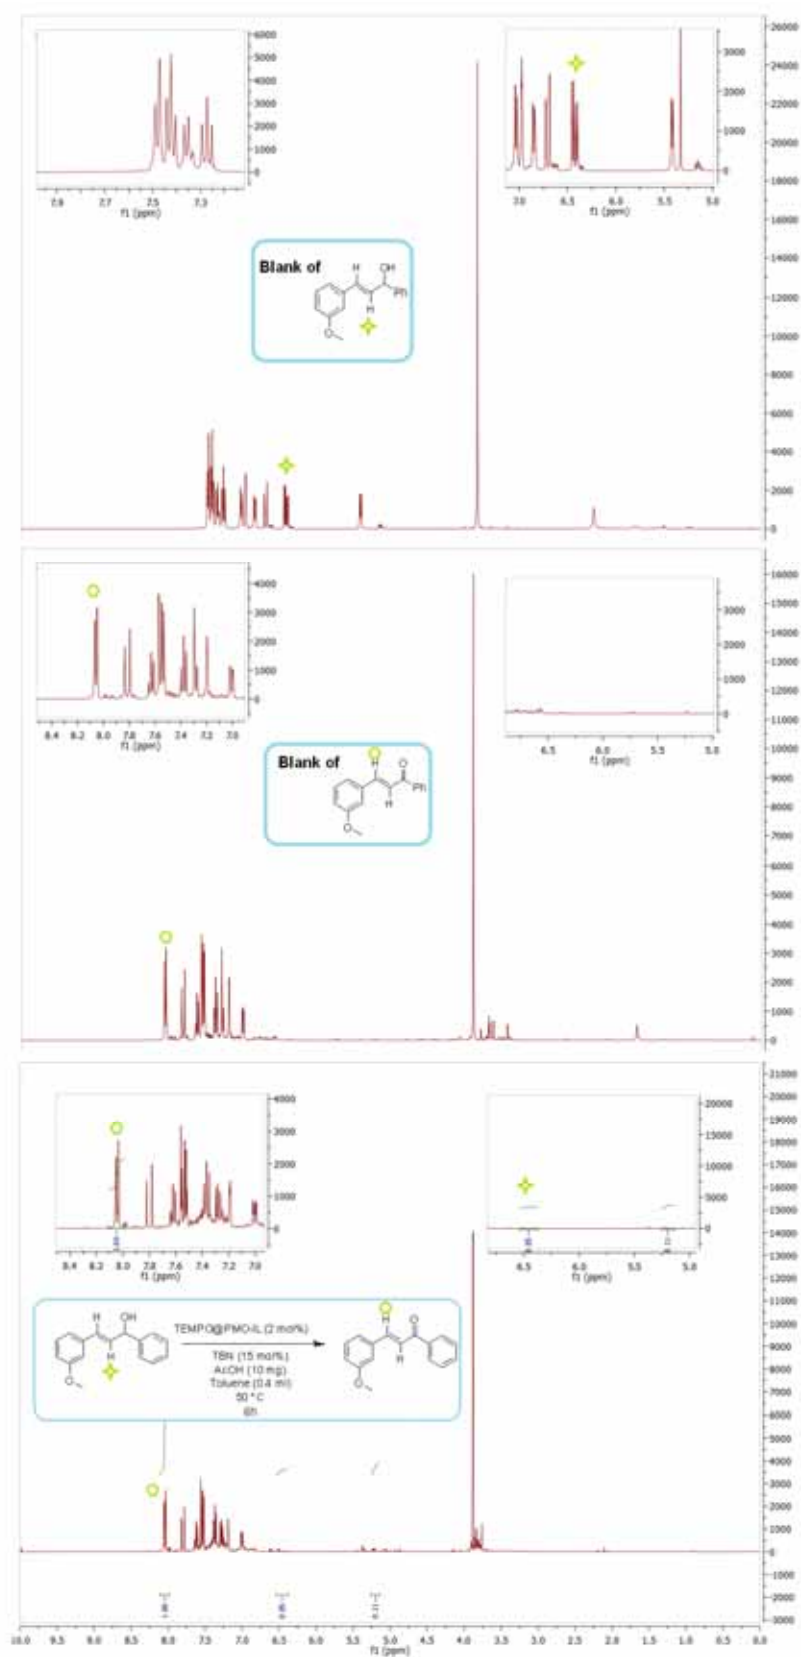

$$Yield = (f_{H_{ketone}}) / (f_{H_{alcohol}} + f_{H_{ketone}} + f_{H_{ether}}) = (1) / (1 + 0.05 + 0.05) = 90\%$$
